# Supplementary material for: Multiplexed DNA detection based on positional encoding/decoding with self-assembled DNA nanostructures
Source: PubMed Central journal article supplement (PMC5811145; doi:10.1039/c4sc02696a), 2014-10-15
Supplement: SC-006-C4SC02696A-s001.pdf [file SC-006-C4SC02696A-s001.pdf]

Supporting Information for

**Multiplexed DNA Detection Based on Positional Encoding/Decoding  
with Self-Assembled DNA Nanostructures**

Sha Sun, Huaxin Yao, Feifei Zhang and Jin Zhu\*

*Department of Polymer Science and Engineering, School of Chemistry and Chemical  
Engineering, State Key Laboratory of Coordination Chemistry, Nanjing National  
Laboratory of Microstructures, Nanjing University, Nanjing 210093, China*

\*Corresponding author. Phone: +86-25-83686291; Fax: +86-25-83317761; Email:  
jinz@nju.edu.cn

## Table of Contents

|                                                                                         |                |
|-----------------------------------------------------------------------------------------|----------------|
| <b>1. Materials .....</b>                                                               | <b>S3</b>      |
| <b>2. Design of Self-Assembled DNA Nanostructures.....</b>                              | <b>S3-S5</b>   |
| <b>3. Experimental Procedures.....</b>                                                  | <b>S5-S6</b>   |
| <b>4. Screening of MgCl<sub>2</sub> Concentration for DNA Hybridization .....</b>       | <b>S6-S8</b>   |
| <b>5. Screening of DNA Hybridization Time .....</b>                                     | <b>S8-S10</b>  |
| <b>6. Single-Target DNA Detection .....</b>                                             | <b>S10</b>     |
| <b>7. DNA Detection Limit .....</b>                                                     | <b>S11</b>     |
| <b>8. PCU DNA Detection System .....</b>                                                | <b>S12</b>     |
| <b>9. Detection of RNA .....</b>                                                        | <b>S13</b>     |
| <b>10. Two-Target DNA Detection .....</b>                                               | <b>S14-S18</b> |
| <b>11. Four-Target DNA Detection .....</b>                                              | <b>S18-S20</b> |
| <b>12. Assembly of DCU .....</b>                                                        | <b>S21</b>     |
| <b>13. Single-Target and Two-Target DNA Detection by DCU Detection System<br/>.....</b> | <b>S22-S26</b> |
| <b>14. DNA Sequence Information .....</b>                                               | <b>S26-S39</b> |
| <b>15. References.....</b>                                                              | <b>S39</b>     |

## 1. Materials

All DNA stands were purchased from Sangon Biotech (Shanghai) Co. Ltd and DL2000 DNA molecular weight marker was from TaKaRa Biotechnology (Dalian) Co. Ltd. Freeze 'N Squeeze column was purchased from Bio-Rad Laboratories, Inc. and uranyl formate was from Polysciences, Inc. Gel electrophoresis was performed on a Bio-Rad system using 2% agarose gel. UV-vis absorption values were obtained using a Eppendorf Biophotometer Plus facility. Transmission electron microscopy (TEM) imaging was performed using a JEOL JEM-1011 facility.

## 2. Design of Self-Assembled DNA Nanostructures

DNA sequences for the nanostructures were generated by program Sequin.<sup>S1</sup> To reduce undesired interaction patterns, criton size is set to 7, which means any continuous sequence of 7 or more nucleotides (nt) appears at most once.

DNA nanostructures were designed by following Peng Yin's LEGO-like model (for all the DNA sequence information, please see Section 14 of the Supporting Information).<sup>S2,S3</sup> In our design of the core cuboid part of **CU**, DNA double helices were arranged as square lattice bundles, as shown in Figure S1. First, we used Sequin to generate sequences for 36 DNA double helices, each of which is 128 BP (base pairs) in length. Then a sequence of 8Ts (eight continuous thymidines) were added to both ends of one strand of each helix (5'-3' strand for odd helices, 3'-5' strand for even helices, refer to Figure S1 for the odd and even numbering of helices) to prevent non-specific blunt-end stacking. Second, a nick site was created for each helix every 16 nt. Because of the different numbers of nt for the two strands of each helix, the nick sites are staggered by 8 nt. Third, the nick sites of each odd helix were linked with the corresponding sites of neighboring even helix clockwise. Take H9 (helix 9) as an example, its protruding 8Ts on the 5' end is linked to the protruding 8Ts on the 3' end of H14, then the first nick site of H9 should be linked to the first one of H10, the second site of H9 to the second one of H2, the third site of H9 to the third one of H8, and the fourth site of H9 to the fourth one of H14. After the linkage, the remaining 16 nt strands should be merged to 32 nt ones to improve the stability of the nanostructures. The registry marker of **CU** is direct extension of the 9 helices, each of which is 64 BP in length, at one corner of the core cuboid.

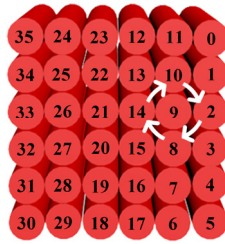

**Figure S1.** The design of **CU** viewed from the cross-section of the end of core cuboid opposite to the registry marker. This view gives a top left corner location for the registry marker.

The locations of 14 capture probe strands at the top and bottom surfaces of **CU** are shown in Figure S2. The locations of 15 detection probe strands of **DU** are shown in Figure S3 and S4.

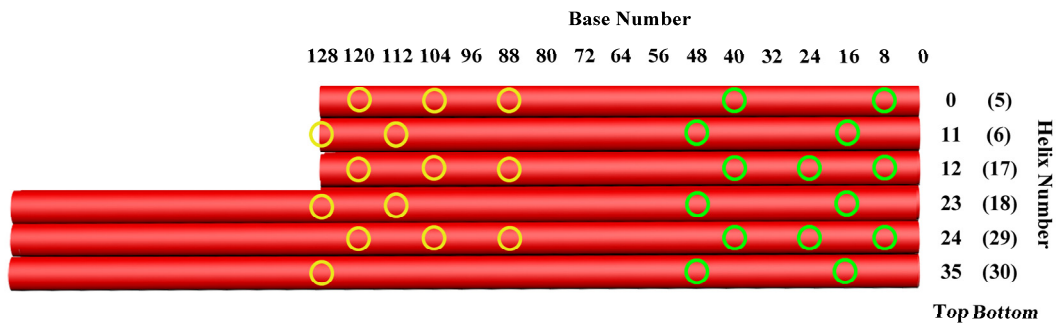

**Figure S2.** The locations of 14 capture probe strands at the top and bottom surfaces of **CU**, with base numbers and helix numbers specified (circle-marked sites at right: for **TT1** and **TB1**; circle-marked sites at left: for **TT2** and **TB2**).

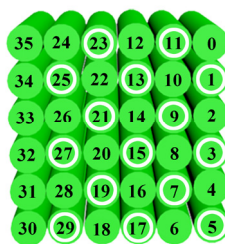

**Figure S3.** The locations of 15 detection probe strands at **DUT1** (identical for **DUT2**), with the base number (64 BP) and helix numbers (circle-marked sites) specified.



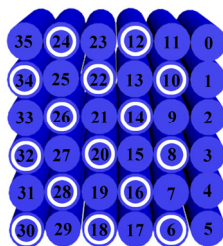

**Figure S4.** The locations of 15 detection probe strands at **DUB2** (identical for **DUB1**), with the base number (64 BP) and helix numbers (circle-marked sites) specified.

**DCU** is assembled by **CU** and a cuboid. There are 10 linker strands at the 5' end of **CU** (linker 1: H0, H2, H4, H8, and H10; linker 2: H24, H26, H28, H32, and H34) and they are complementary to the other 10 strands dangling from the 3' end of the cuboid (linker 1: H1, H3, H5, H7, and H9; linker 2: H25, H27, H29, H31, and H33). The locations of 10 linker strands are shown in Figures S5 and S6.

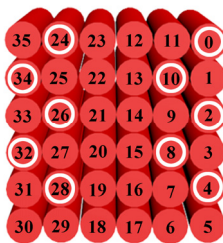

**Figure S5.** The locations of 10 linker strands at **CU**, with the base number (1 BP) and helix numbers (circle-marked sites) specified.

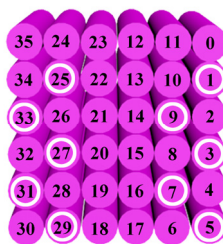

**Figure S6.** The locations of 10 linker strands at cuboid, with the base number (128 BP) and helix numbers (circle-marked sites) specified.

### 3. Experimental Procedures

**Preparation of nanostructures:** Hundreds of single-strand DNA (ssDNA) were mixed and then freeze-dried. After the dissolution of ssDNA in 0.5×TE buffer (5 mM Tris, 1 mM EDTA, pH=8.0, supplemented with 40 mM MgCl<sub>2</sub>) to a final concentration of 200 nM per strand, the solution was annealed from 90 °C to 60 °C at a cooling rate of 5 min/°C and from 60 °C to 24 °C at a rate of 2 h/°C.

**Purification of nanostructures:** The annealed samples were loaded to a native 2% agarose gel with 0.5  $\mu\text{g}/\text{mL}$  ethidium bromide (running buffer: 0.5 $\times$ TBE buffer, containing 44.5 mM Tris, 44.5 mM boric acid, and 1 mM EDTA, supplemented with 11 mM  $\text{MgCl}_2$ ) and gel electrophoresis was performed at 80 volts for 2 h in an ice bath. Target bands were excised and cut into small pieces. The gel pieces were placed into Freeze 'N Squeeze columns, frozen at  $-20\text{ }^\circ\text{C}$  for 5 min and then centrifuged at 7000g at  $4\text{ }^\circ\text{C}$  for 5 min.

**Hybridization assay:** DNA Nanostructures were quantified by measurements of UV-vis absorption values at 260 nm. Different DNA nanostructures were mixed in a molar ratio of 1:1 and target DNA (3  $\mu\text{L}$ ) was then added to the mixture. The solution was diluted with 0.5 $\times$ TBE buffer to a final volume of 10  $\mu\text{L}$  (5 nM for the final concentration of each nanostructure). The hybridization was allowed to proceed at  $30\text{ }^\circ\text{C}$ .

**TEM imaging:** A 2.1  $\mu\text{L}$  of hybridization solution was mixed with 0.3  $\mu\text{L}$  of ssDNA (with a sequence of 5'-GCCTGAAGTCTGGTGCTTAGGCCTTGAAATCA-3' for the generation of a hydrophilic TEM grid surface) and the whole solution was loaded onto a glass slide. On top of the solution was covered with a carbon-coated TEM grid and the contact between the solution and grid was allowed to proceed for 2 min. The TEM grid was then stained with a 2% uranyl formate aqueous solution (containing 25 mM NaOH) for 2 min followed by twice wash with water. TEM imaging was performed at 100 kV.

#### 4. Screening of $\text{MgCl}_2$ Concentration for DNA Hybridization

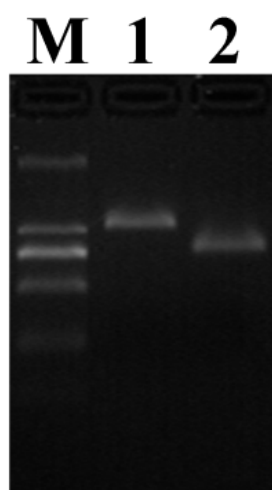

**Figure S7.** Gel electrophoresis bands for purified **CU** and **DUT1**. Lane M: DL2000 molecular weight marker (same for all the following gel electrophoresis images); Lane 1: **CU**; Lane 2: **DUT1**.

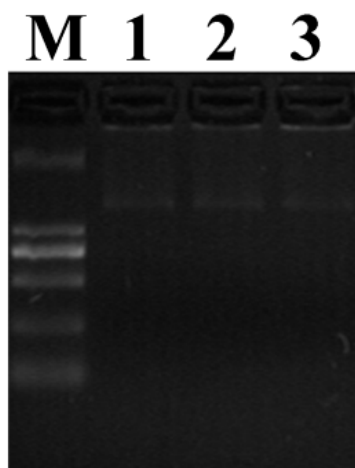

**Figure S8.** Gel electrophoresis bands for **CU**, **DUT1**, and **TT1** in the presence of different concentrations of  $\text{MgCl}_2$ . Lane 1: 11 mM  $\text{MgCl}_2$ ; Lane 2: 20 mM  $\text{MgCl}_2$ ; Lane 3: 30 mM  $\text{MgCl}_2$ . The concentration of **TT1** is 300 nM. The non-penetrating material in the gel is the non-specific aggregation of the hybridization product, which probably appears after storage at 4 °C and could be reduced by pre-heating the sample at 30 °C before gel electrophoresis (same for all the following gel electrophoresis images).

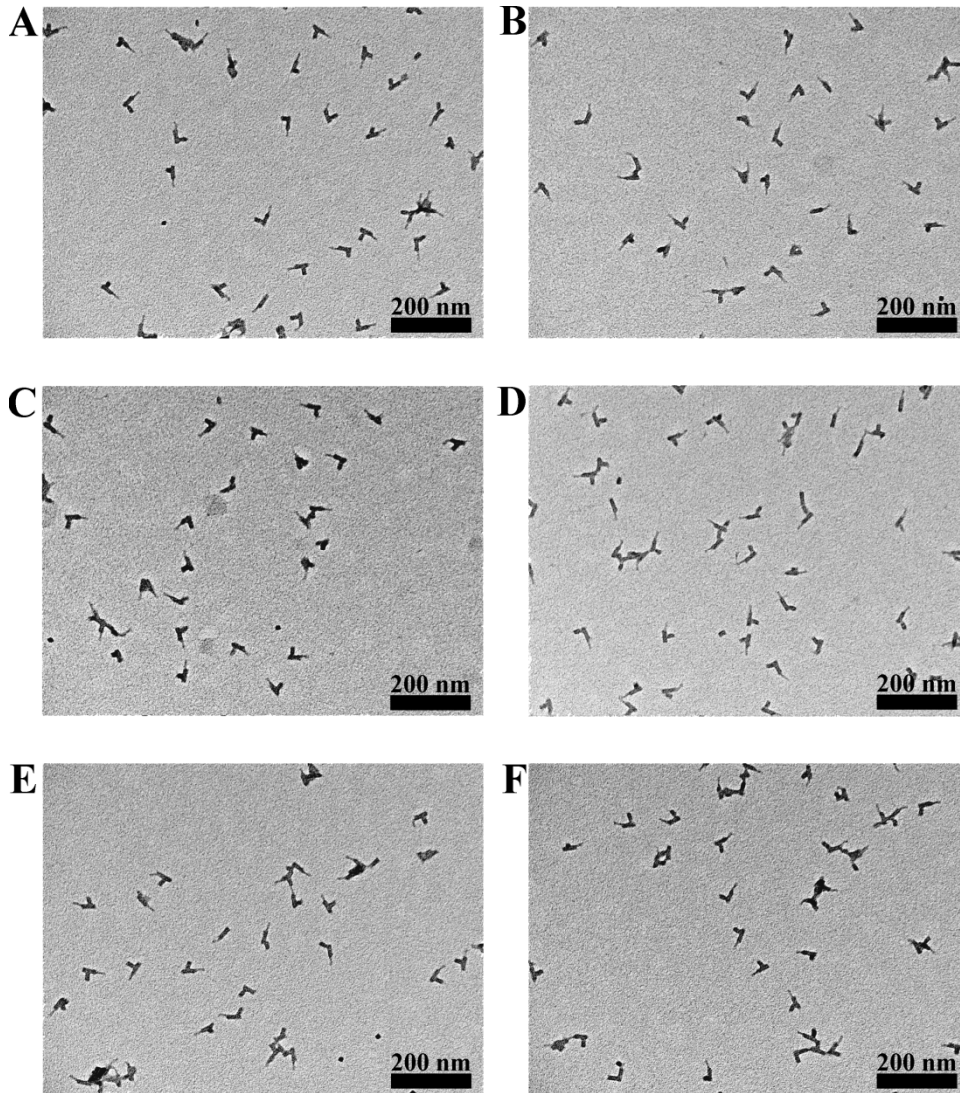

**Figure S9.** Representative TEM images of CU, DUT1, and TT1 in the presence of different concentrations of MgCl<sub>2</sub>. A) and B): 11 mM MgCl<sub>2</sub>; C) and D): 20 mM MgCl<sub>2</sub>; E) and F): 30 mM MgCl<sub>2</sub>. The concentration of TT1 is 300 nM.

## 5. Screening of DNA Hybridization Time

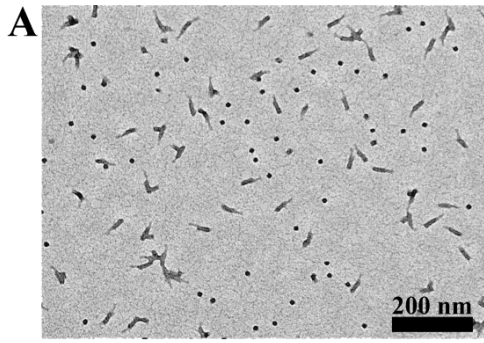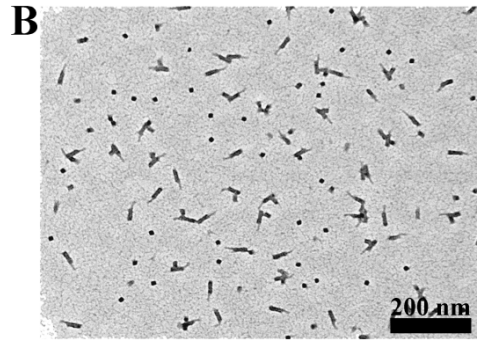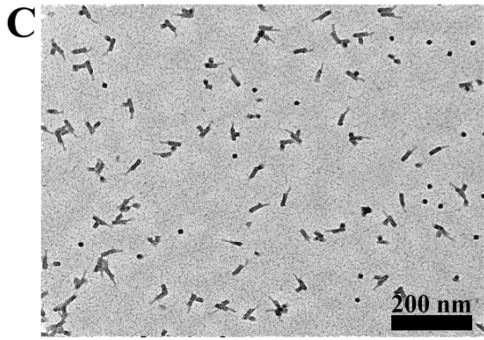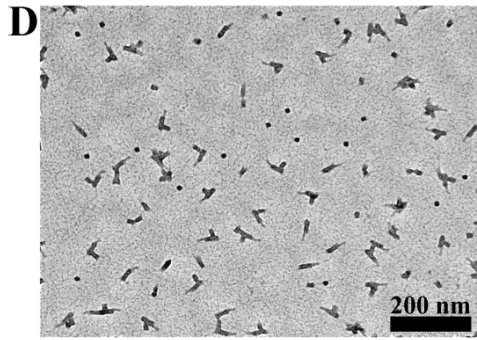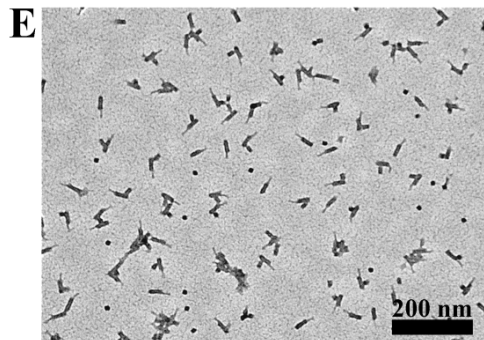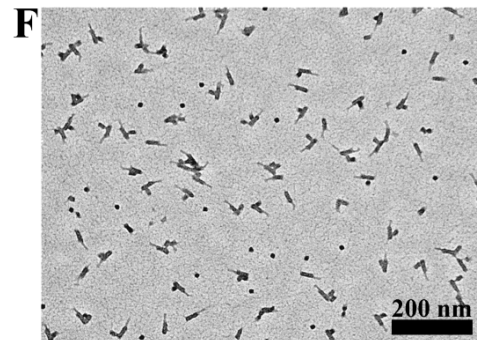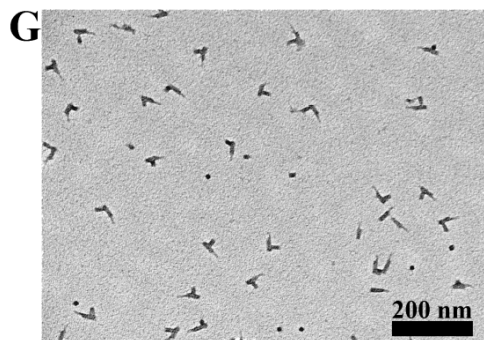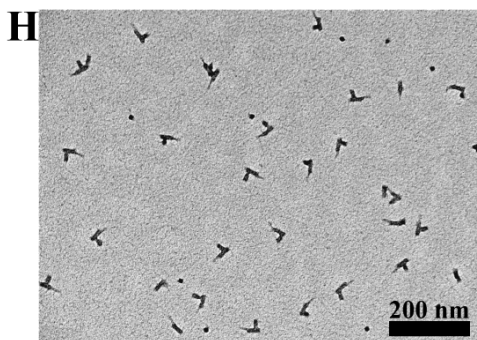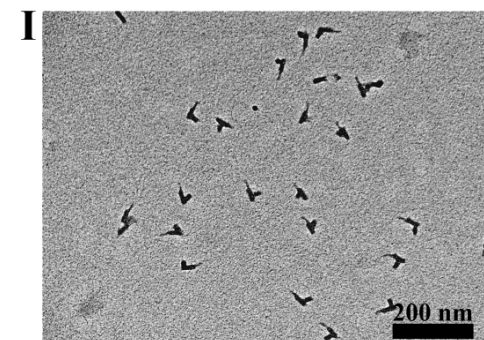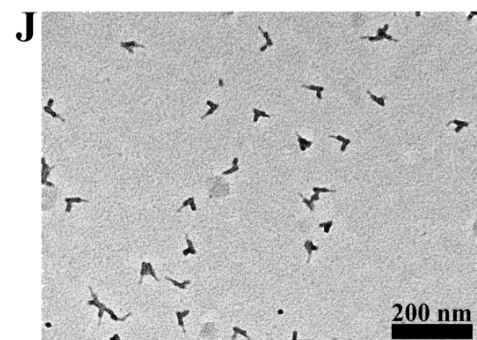



**Figure S10.** Representative TEM images of CU, DUT1, and TT1 after hybridization for different durations of time. A) and B): 5 min (hybridization percentage, or HP: 41%); C) and D): 10 min (HP: 63%); E) and F): 20 min (HP: 71%); G) and H): 1 h (HP: 88%); I) and J): 8 h (HP: 91%). HP is defined as the percentage of observed CU-DUT1 over all structurally resolved CU (calculated from ~300 CU). The concentration of TT1 is 300 nM. The small dark square objects in the images are individual DUT1 which prefer head-on settlement on the carbon grid instead of side-on settlement as hybridized DUT1. All kinds of individual DU (DUT1, DUT2, DUB1, DUB2 and DUB3) show head-on settlement in the following TEM images.

## 6. Single-Target DNA Detection

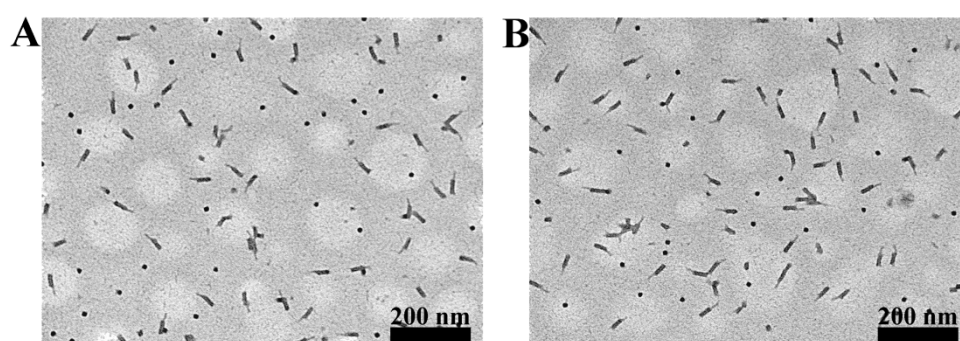

**Figure S11.** Representative TEM images of CU and DUT1 in the absence of TT1.

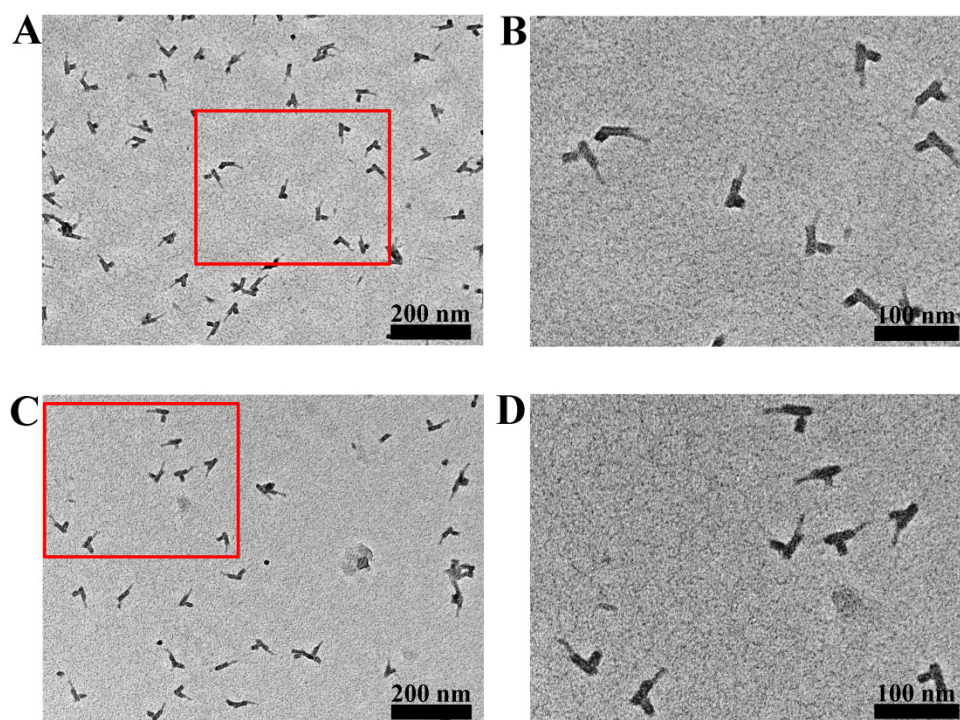

**Figure S12.** Representative TEM images of CU and DUT1 in the presence of TT1. B) and D) are enlarged view images of A) and C), respectively (rectangles marked in red)

serve only as an approximate viewing guide for the enlarged area; same for all the following TEM images if applicable). The concentration of **TT1** is 300 nM.

## 7. DNA Detection Limit

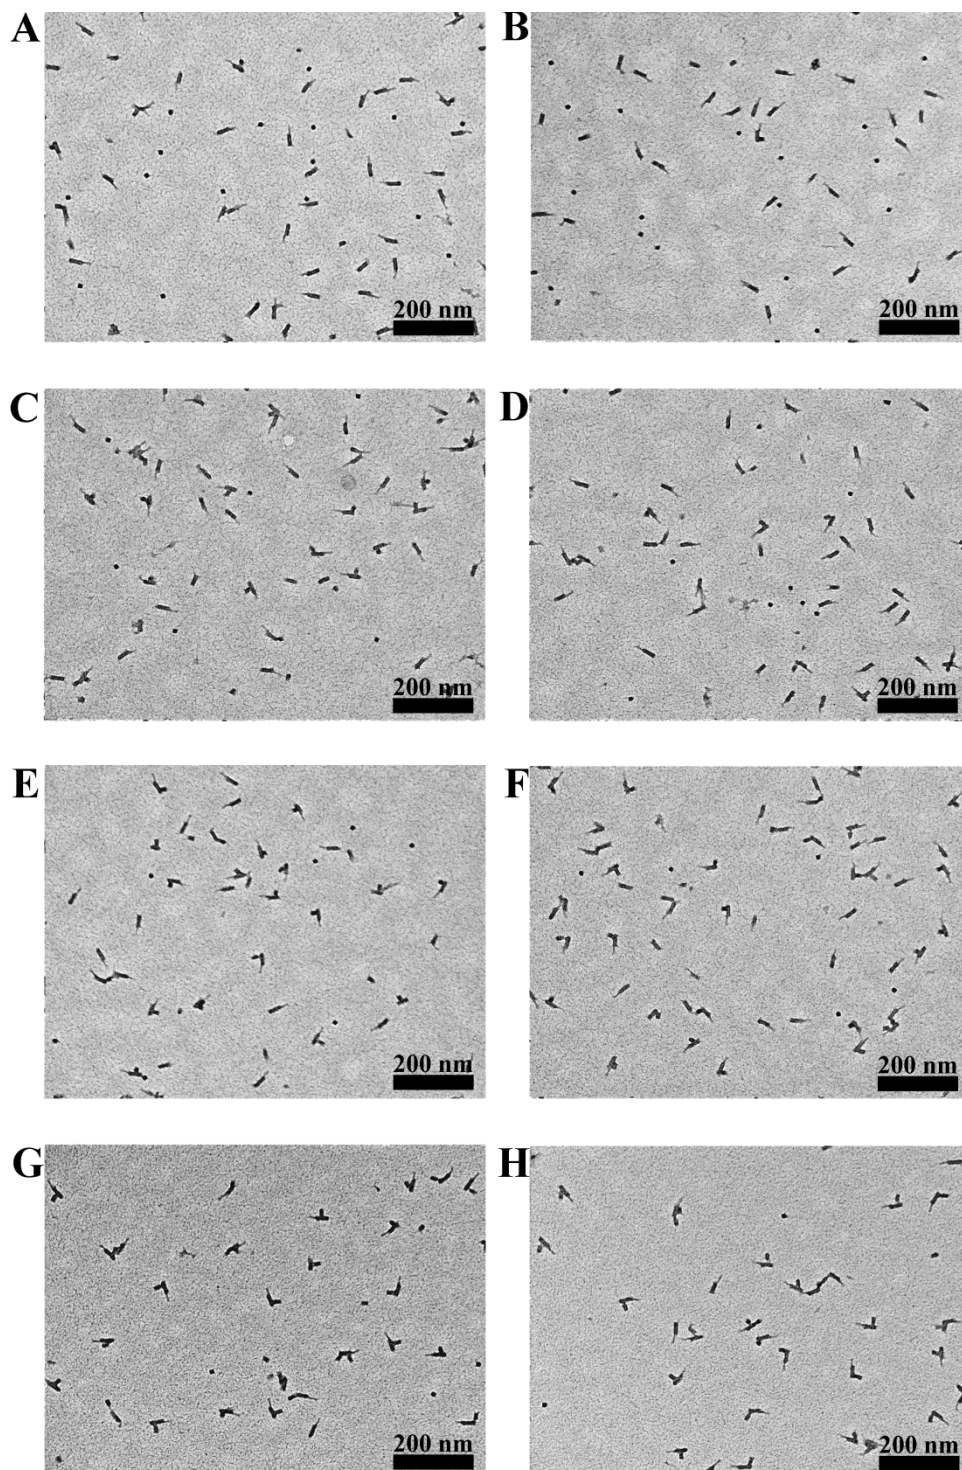

**Figure S13.** Representative TEM images of **CU** and **DUT1** in the presence of different concentrations of **TT1**. A) and B): 5 nM (HP: 10%); C) and D): 10 nM (HP: 10%); E) and F): 10 nM (HP: 10%); G) and H): 10 nM (HP: 10%).

37%); E) and F): 20 nM (HP: 65%). G) and H): 30 nM (HP: 88%). HP was determined by calculation from ~250 CU.

## 8. PCU DNA Detection System

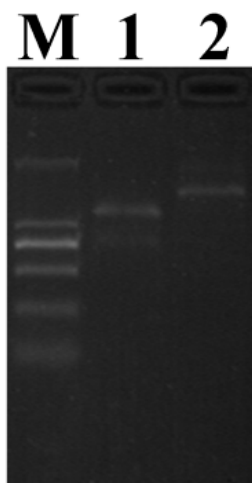

**Figure S14.** Gel electrophoresis bands for PCU and DUT1 in the absence (lane 1) and presence (lane 2) of TT1. The concentration of TT1 is 300 nM.

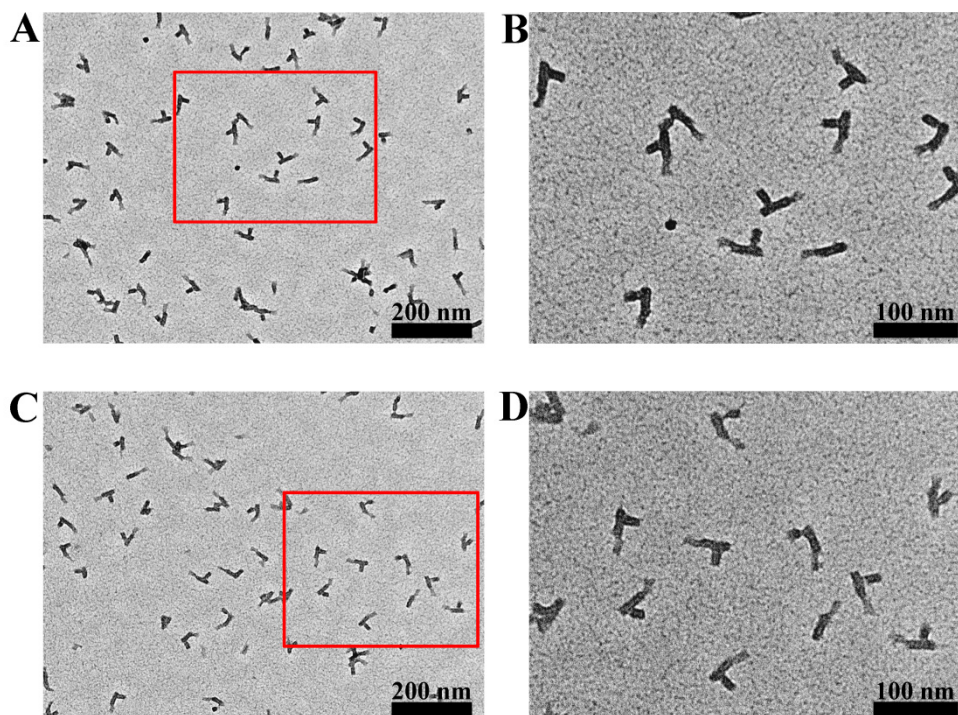

**Figure S15.** Representative TEM images of PCU and DUT1 in the presence of TT1. B) and D) are enlarged view images of A) and C), respectively. The concentration of TT1 is 300 nM.



## 9. Detection of RNA

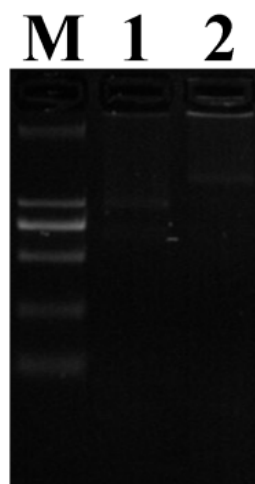

**Figure S16.** Gel electrophoresis bands for **CU** and **DUT1** in the absence (lane 1) and presence (lane 2) of **RTT1**. The concentration of **RTT1** is 300 nM.

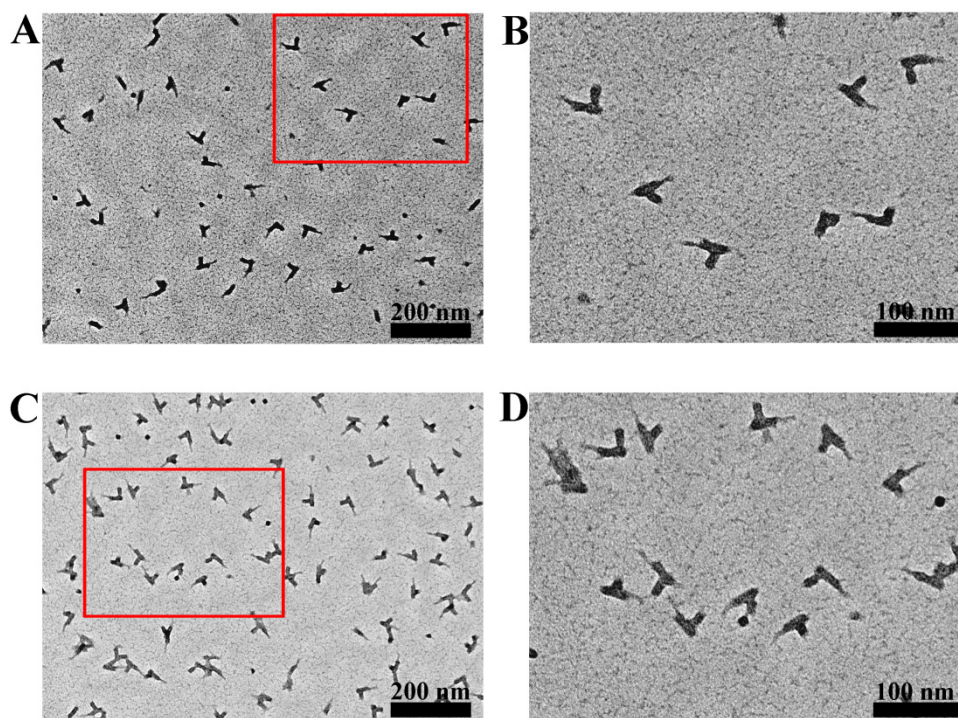

**Figure S17.** Representative TEM images of **CU** and **DUT1** in the presence of **RTT1**. B) and D) are enlarged view images of A) and C), respectively. The concentration of **RTT1** is 300 nM.

## 10. Two-Target DNA Detection

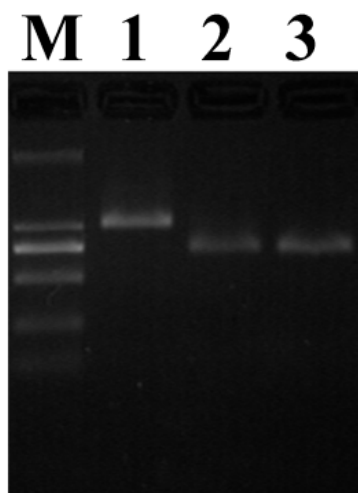

**Figure S18.** Gel electrophoresis bands for purified CU, DUT1, and DUB2. Lane 1: CU; Lane 2: DUT1; Lane 3: DUB2.

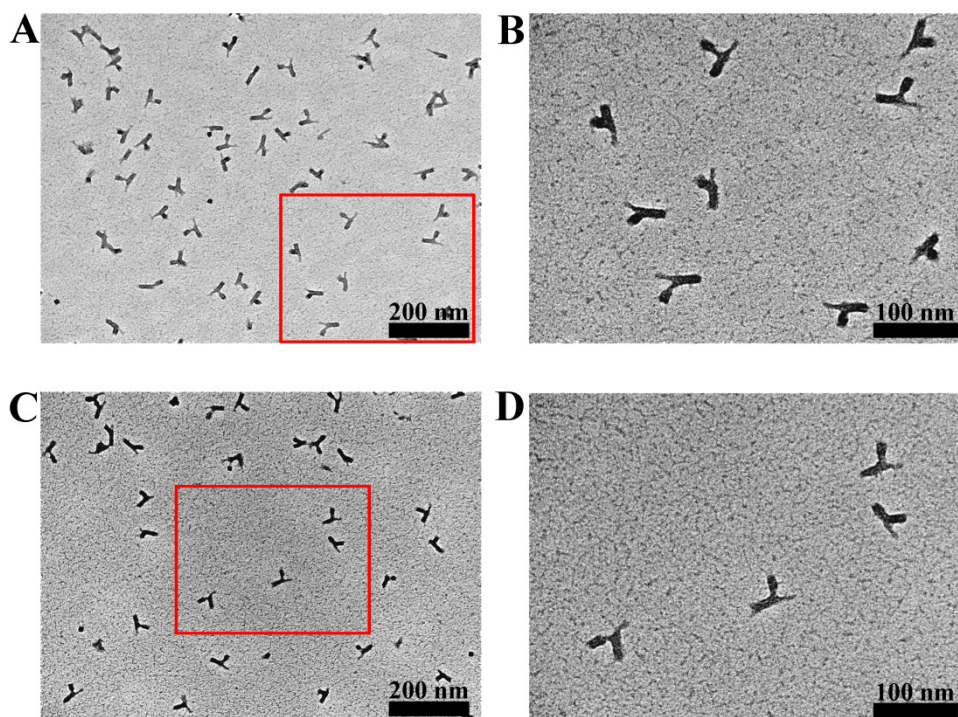

**Figure S19.** Representative TEM images of CU and DUB2 in the presence of TB2. B) and D) are enlarged view images of A) and C), respectively. The concentration of TB2 is 300 nM.

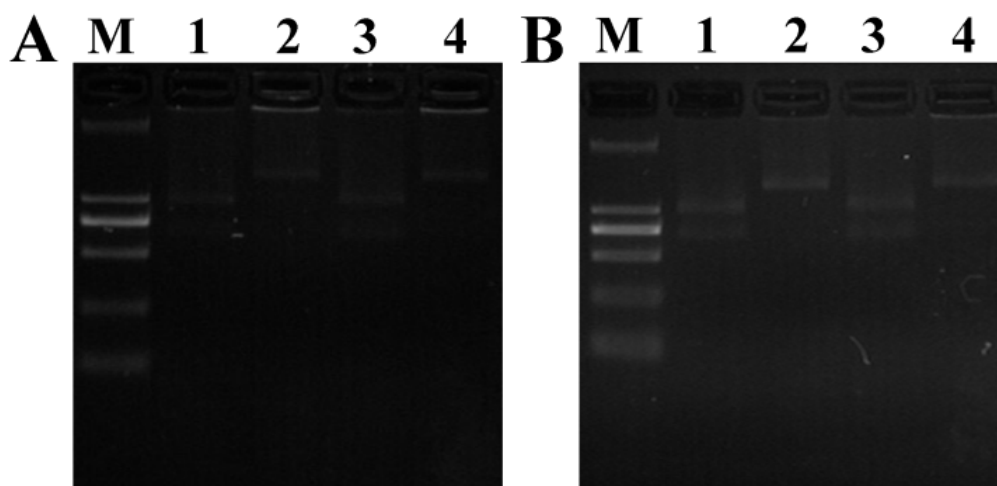

**Figure S20.** Gel electrophoresis bands for two-target detection (separate hybridization). A) CU and **DUT1** in the absence (lane 1) and presence (lane 2) of **TT1**, CU and **DUT1** in the presence of **TB2** (lane 3), CU and **DUT1** in the presence of both **TT1** and **TB2** (lane 4); B) CU and **DUB2** in the absence (lane 1) and presence (lane 2) of **TB2**, CU and **DUB2** in the presence of **TT1** (lane 3), CU and **DUB2** in the presence of both **TT1** and **TB2** (lane 4). The concentrations of **TT1** and **TB2** are 300 nM.

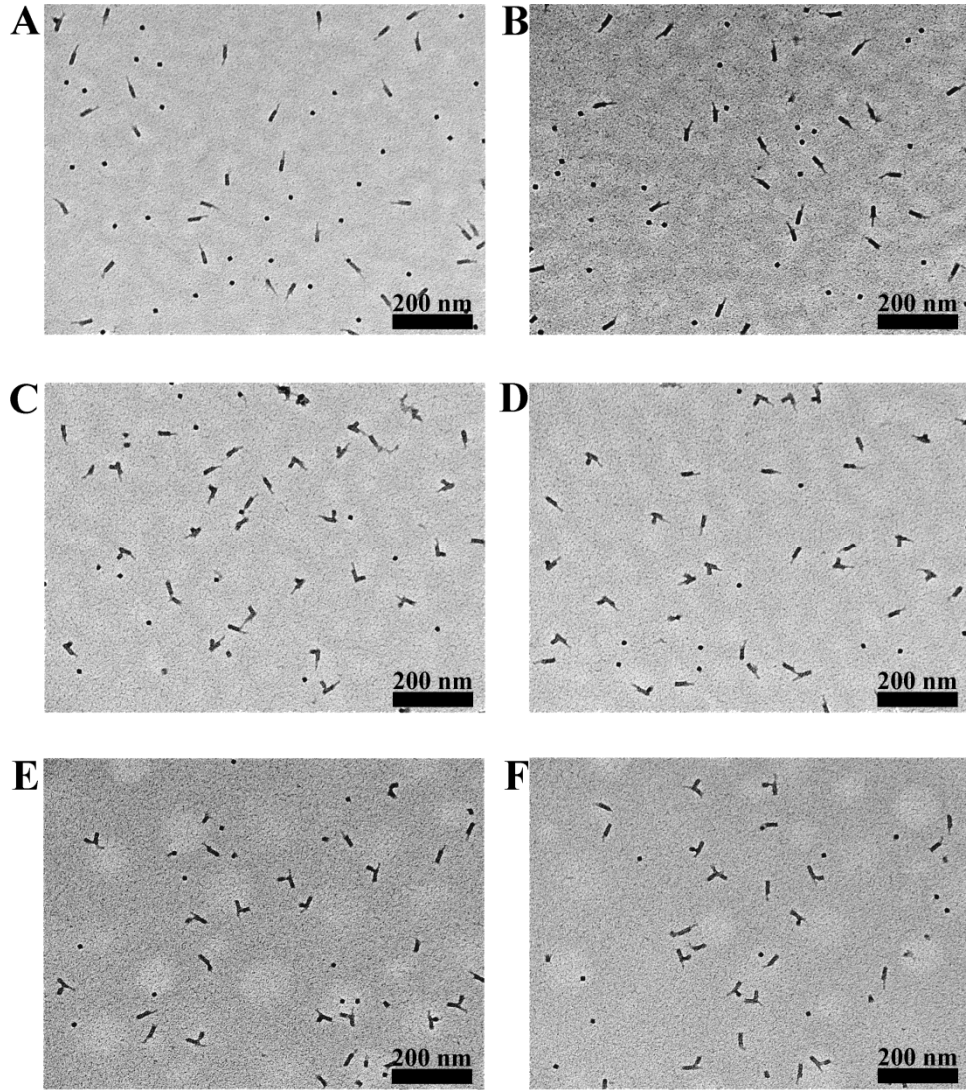

**Figure S21.** Representative TEM images for two-target detection (in the presence of one target). A) and B) CU and DUT1, CU and DUB2 in the presence of neither TT1 nor TB2; C) and D) CU and DUT1, CU and DUB2 in the presence of TT1 (HP: 50%); E) and F) CU and DUT1, CU and DUB2 in the presence of TB2 (HP: 48%). HP was determined by calculation from ~250 CU. The concentrations of TT1 and TB2 are 300 nM.



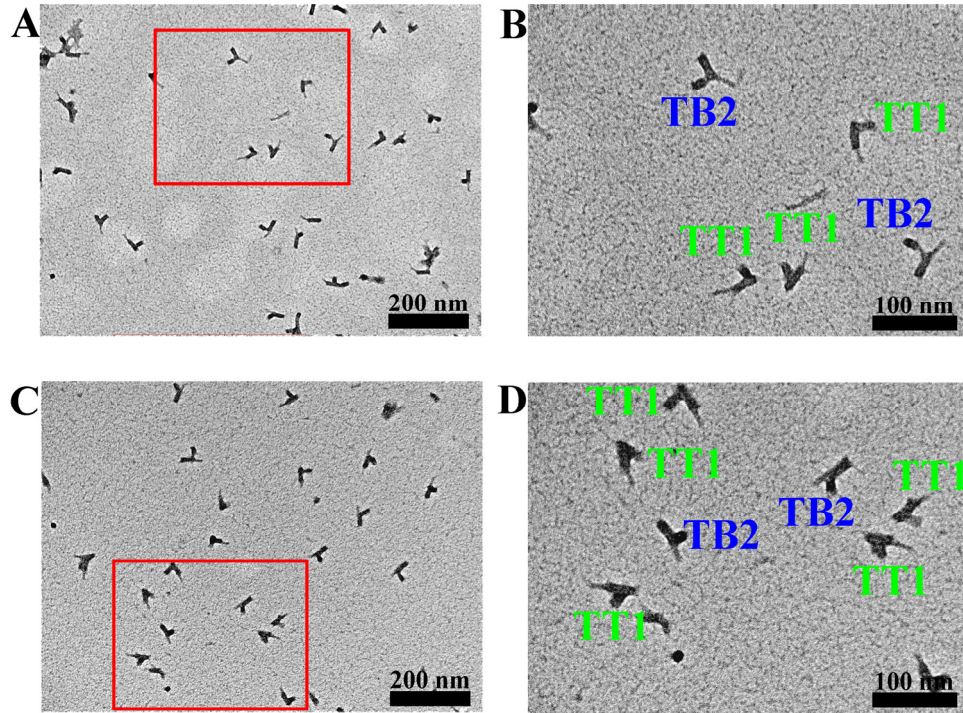

**Figure S22.** Representative TEM images for two-target detection (separate hybridization, in the presence of two targets). CU and DUT1, CU and DUB2 in the presence of both TT1 and TB2 (HP for CU-DUT1: 46%; HP for CU-DUB2: 45%). B) and D) are enlarged view images of A) and C), respectively. HP was determined by calculation from ~250 CU. The concentrations of TT1 and TB2 are 300 nM.

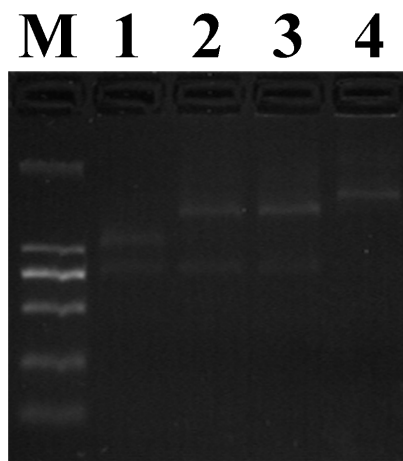

**Figure S23.** Gel electrophoresis bands for two-target detection (simultaneous hybridization). Lane 1: CU, DUT1, and DUB2 in the absence of either TT1 or TB2; Lane 2: CU, DUT1, and DUB2 in the presence of TT1; Lane 3: CU, DUT1, and DUB2 in the presence of TB1; Lane 4: CU, DUT1, and DUB2 in the presence of both TT1 and TB2. The concentrations of TT1 and TB2 are 300 nM.

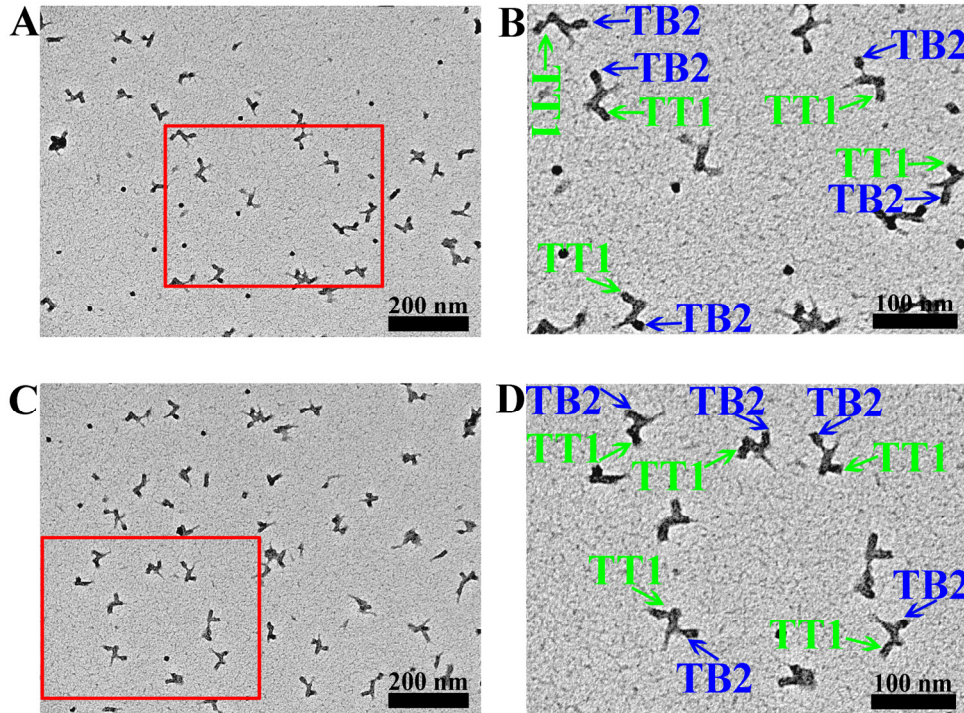

**Figure S24.** Representative TEM images for two-target detection (simultaneous hybridization). CU, DUT1, and DUB2 in the presence of both TT1 and TB2 (HP for CU-DUT1: 80%; HP for CU-DUB2: 83%; for calculation of HP in the case of simultaneous hybridization, CU-DUT1 and CU-DUB2 are counted for any structure containing CU-DUT1 and CU-DUB2, respectively). B) and D) are enlarged view images of A) and C), respectively. HP was determined by calculation from ~200 CU. The concentrations of TT1 and TB2 are 300 nM.

## 11. Four-Target DNA Detection

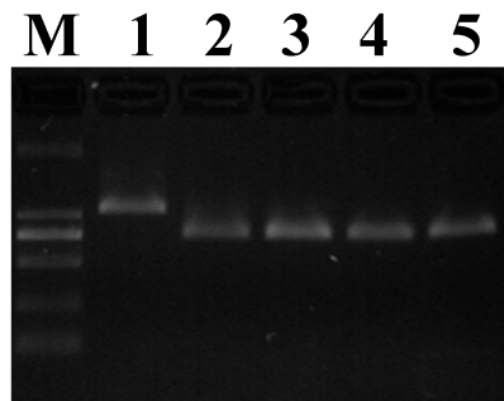

**Figure S25.** Gel electrophoresis bands for purified CU, DUT1, DUT2, DUB1, and DUB2. Lane 1: CU; Lane 2: DUT1; Lane 3: DUT2; Lane 4: DUB1; Lane 5: DUB2.



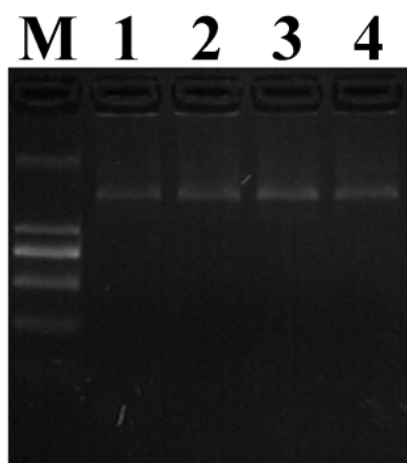

**Figure S26.** Gel electrophoresis bands for four-target (TT1, TT2, TB1, TB2; separate hybridization) detection. Lane 1: CU and DUT1 in the presence of four targets; Lane 2: CU and DUT2 in the presence of four targets; Lane 3: CU and DUB1 in the presence of four targets; Lane 4: CU and DUB2 in the presence of four targets.

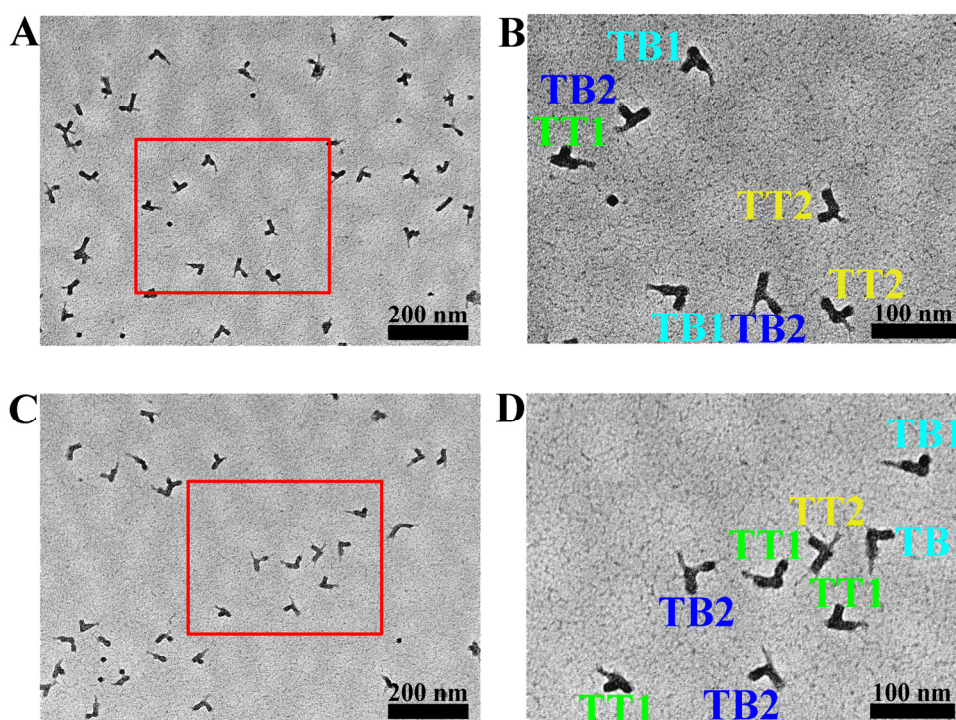

**Figure S27.** Representative TEM images for four-target detection (separate hybridization). CU and DUT1, CU and DUT2, CU and DUB1, CU and DUB2 in the presence of four targets (TT1, TT2, TB1, TB2) (HP for CU-DUT1: 22%; HP for CU-DUT2: 23%; HP for CU-DUB1: 25%; HP for CU-DUB2: 24%). B) and D) are enlarged view images of A) and C), respectively. HP was determined by calculation from ~300 CU. The concentrations of four targets are all 300 nM.

**M 1**

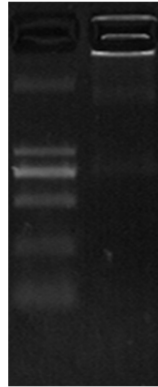

**Figure S28.** Gel electrophoresis bands for four-target (TT1, TT2, TB1, TB2; simultaneous hybridization) detection. Lane 1: CU, DUT1, DUT2, DUB1, and DUB2 in the presence of four targets.

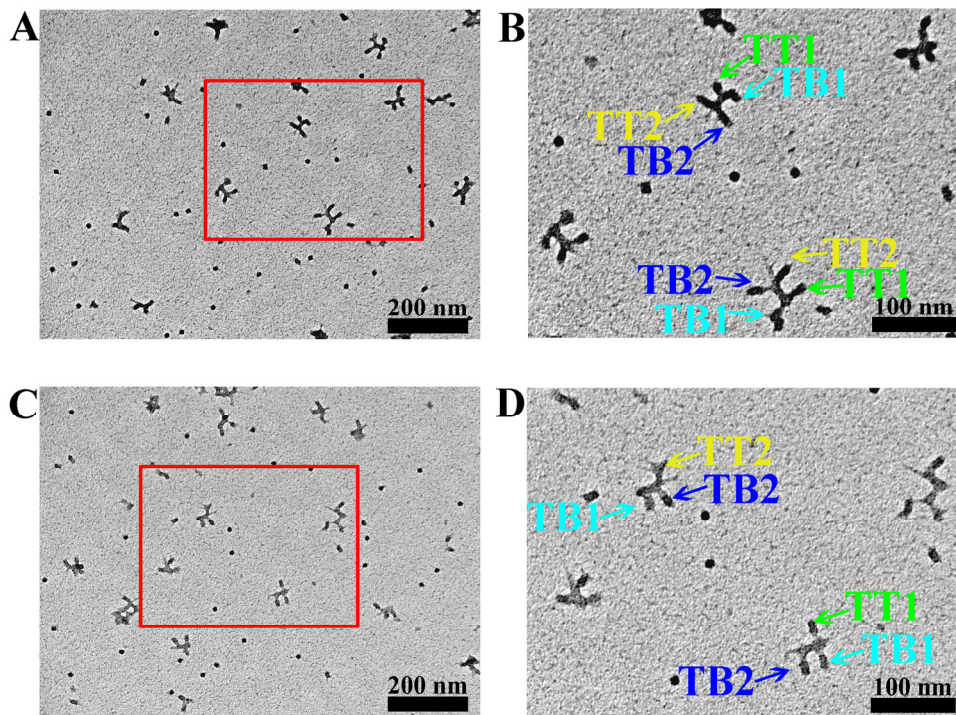

**Figure S29.** Representative TEM images for four-target detection (simultaneous hybridization). CU, DUT1, DUT2, DUB1, and DUB2 in the presence of four targets (TT1, TT2, TB1, TB2) (HP for CU-DUT1: 85%; HP for CU-DUT2: 75%; HP for CU-DUB1: 79%; HP for CU-DUB2: 86%). B) and D) are enlarged view images of A) and C), respectively. HP was determined by calculation from ~200 CU. The concentrations of four targets are all 300 nM.



## 12. Assembly of DCU

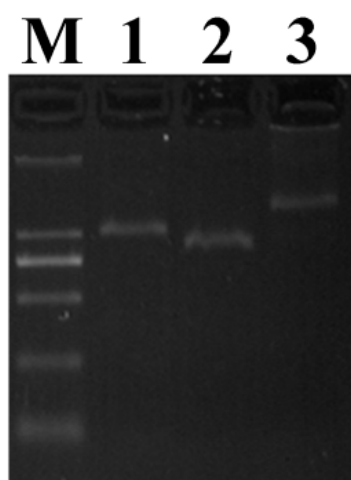

**Figure S30.** Gel electrophoresis bands for purified **CU**, a purified cuboid with a size identical to the core cuboid part of **CU**, and **DCU**. Lane 1: **CU**; Lane 2: cuboid; Lane 3: **DCU**.

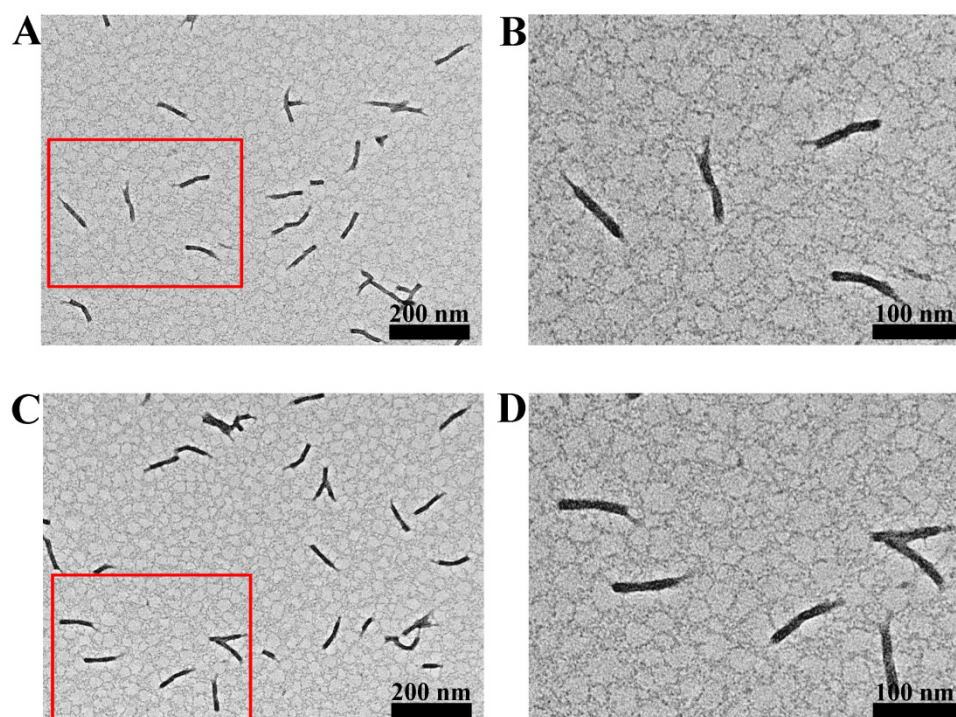

**Figure S31.** Representative TEM images of **DCU** (HP: 86%). HP is defined as the percentage of observed **DCU** over all structurally resolved **CU** (calculated from ~250 **CU**).

### 13. Single-Target and Two-Target DNA Detection by DCU Detection System

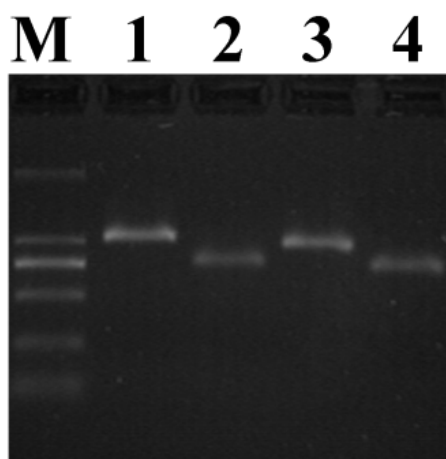

**Figure S32.** Gel electrophoresis bands for purified **CU**, **DUT1**, cuboid, and **DUB3**. Lane 1: **CU**; Lane 2: **DUT1**; Lane 3: cuboid; Lane 4: **DUB3**.

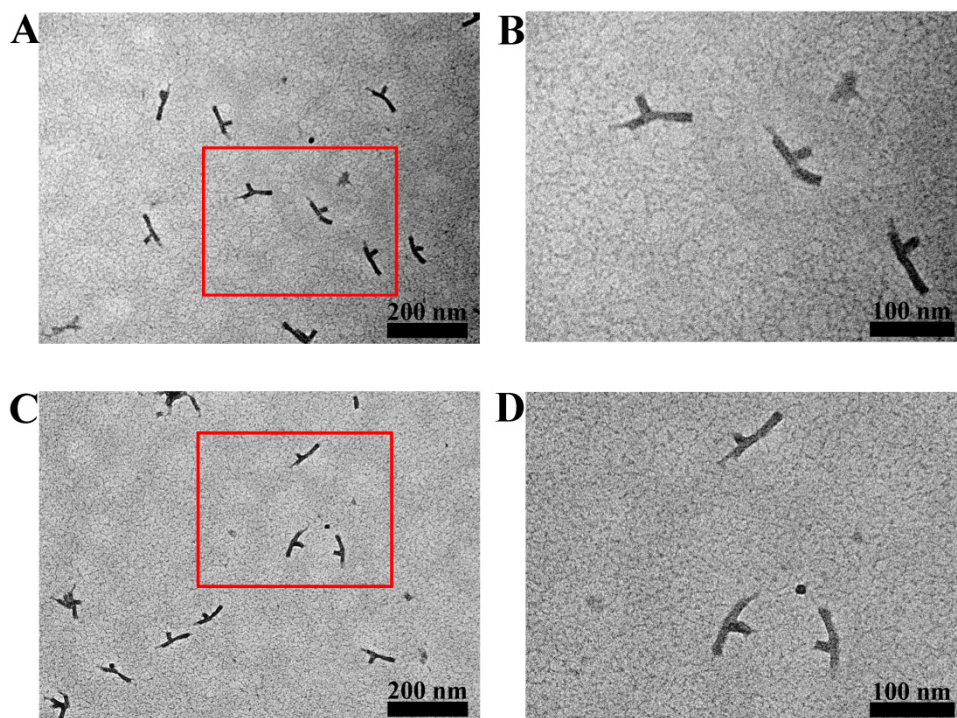

**Figure S33.** Representative TEM images of **DCU** and **DUT1** in the presence of **TT1** (HP: 92%). B) and D) are enlarged view images of A) and C), respectively. HP is defined as the percentage of observed **DCU-DUT1** over all structurally resolved **DCU** (calculated from ~200 **DCU**). The concentration of **TT1** is 300 nM.

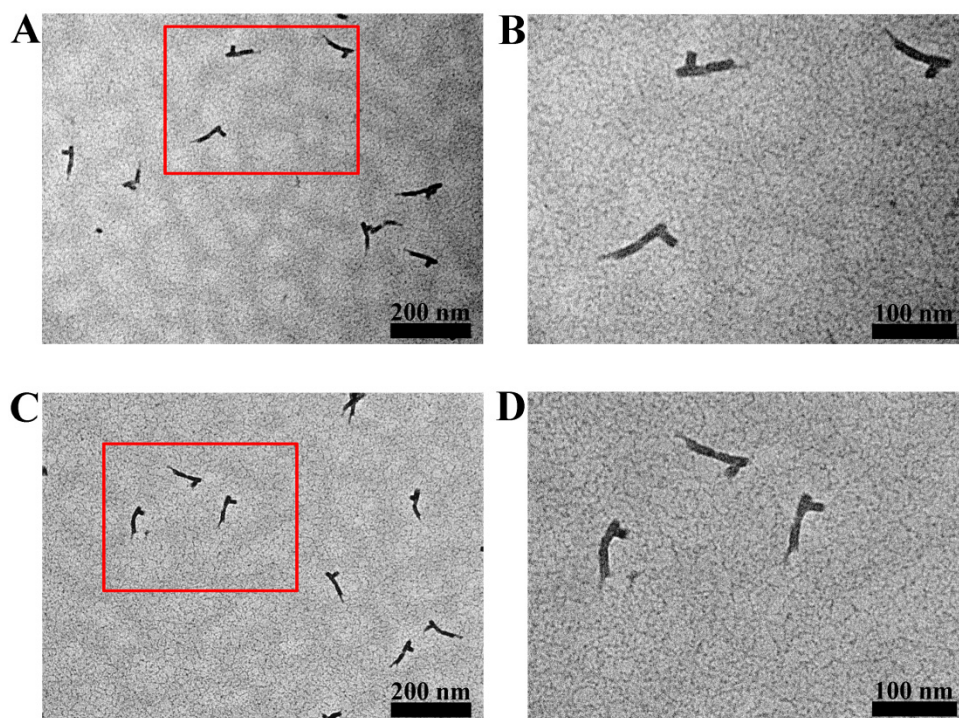

**Figure S34.** Representative TEM images of **DCU** and **DUB3** in the presence of **TB3** (HP: 93%). **B**) and **D**) are enlarged view images of **A**) and **C**), respectively. HP is defined as the percentage of observed **DCU-DUB3** over all structurally resolved **DCU** (calculated from ~200 **DCU**). The concentration of **TB3** is 300 nM.

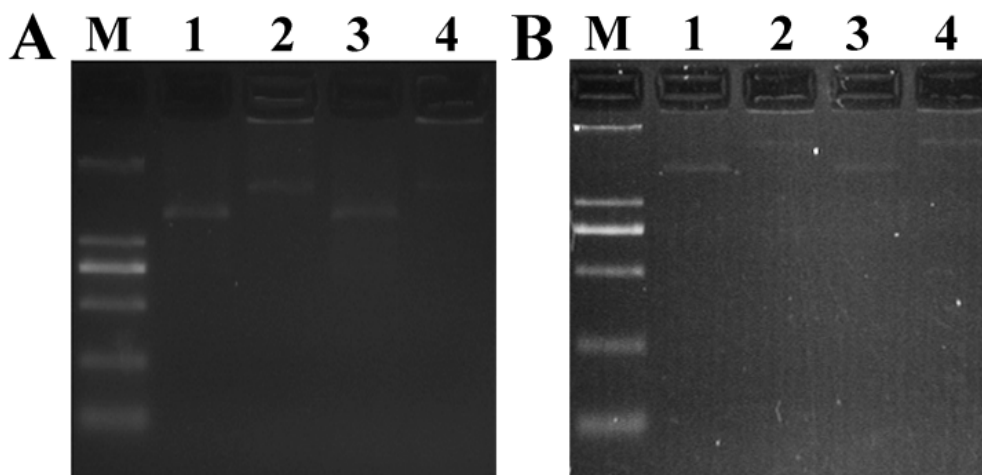

**Figure S35.** Gel electrophoresis bands for two-target detection. **A**) **DCU** and **DUT1** in the absence (lane 1) and presence (lane 2) of **TT1**, **DCU** and **DUT1** in the presence of **TB3** (lane 3), **DCU** and **DUT1** in the presence of both **TT1** and **TB3** (lane 4); **B**) **DCU** and **DUB3** in the absence (lane 1) and presence (lane 2) of **TB3**, **DCU** and **DUB3** in the presence of **TT1** (lane 3), **DCU** and **DUB3** in the presence of both **TT1** and **TB3** (lane 4). The concentrations of **TT1** and **TB3** are 300 nM.



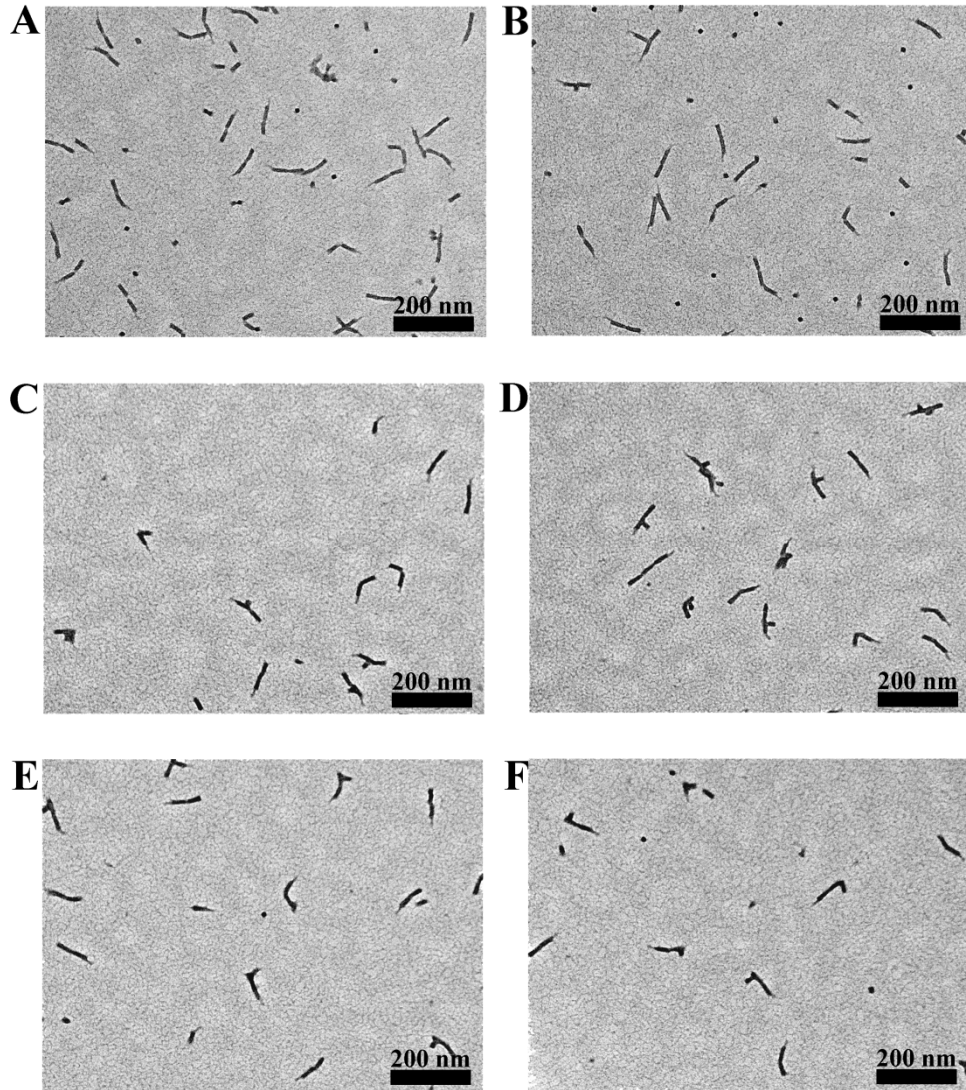

**Figure S36.** Representative TEM images for two-target detection (in the presence of one target). A) and B) **DCU** and **DUT1**, **DCU** and **DUB3** in the presence of neither **TT1** nor **TB3**; C) and D) **DCU** and **DUT1**, **DCU** and **DUB3** in the presence of **TT1** (HP for **DCU-DUT1**: 47%); E) and F) **DCU** and **DUT1**, **DCU** and **DUB3** in the presence of **TB3** (HP for **DCU-DUB3**: 51%). HP was determined by calculation from ~200 **DCU**. The concentrations of **TT1** and **TB3** are 300 nM.

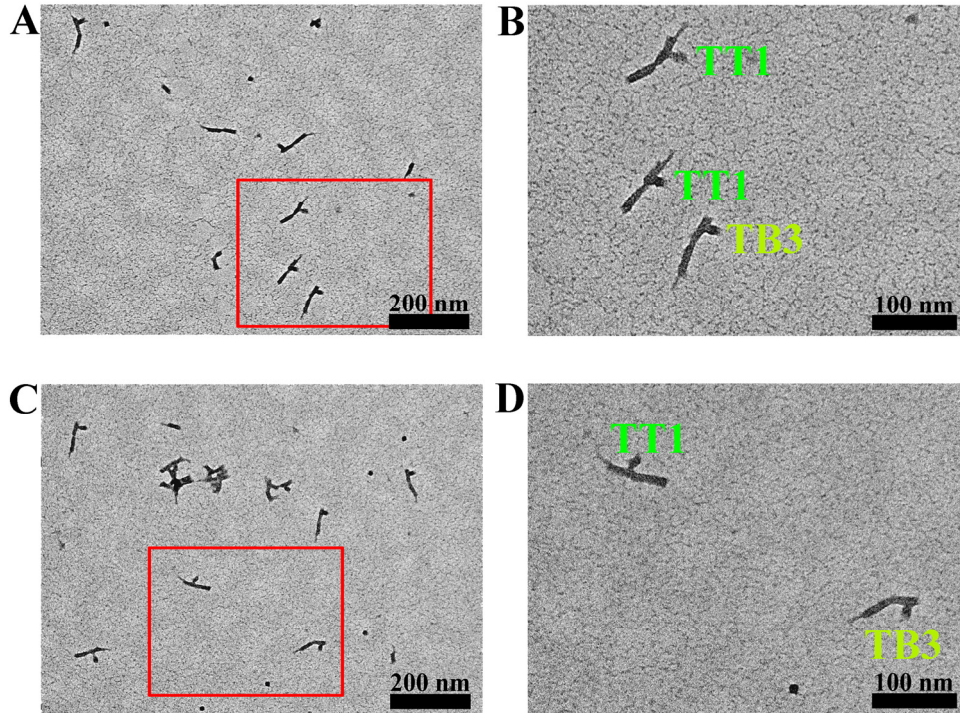

**Figure S37.** Representative TEM images for two-target detection (separate hybridization, in the presence of two targets). A)-D) DCU and DUT1, DCU and DUB3 in the presence of both TT1 and TB3 (HP for DCU-DUT1: 44%; HP for DCU-DUB3: 48%). B) and D) are enlarged view images of A) and C), respectively. HP was determined by calculation from  $\sim 200$  DCU. The concentrations of TT1 and TB3 are 300 nM.

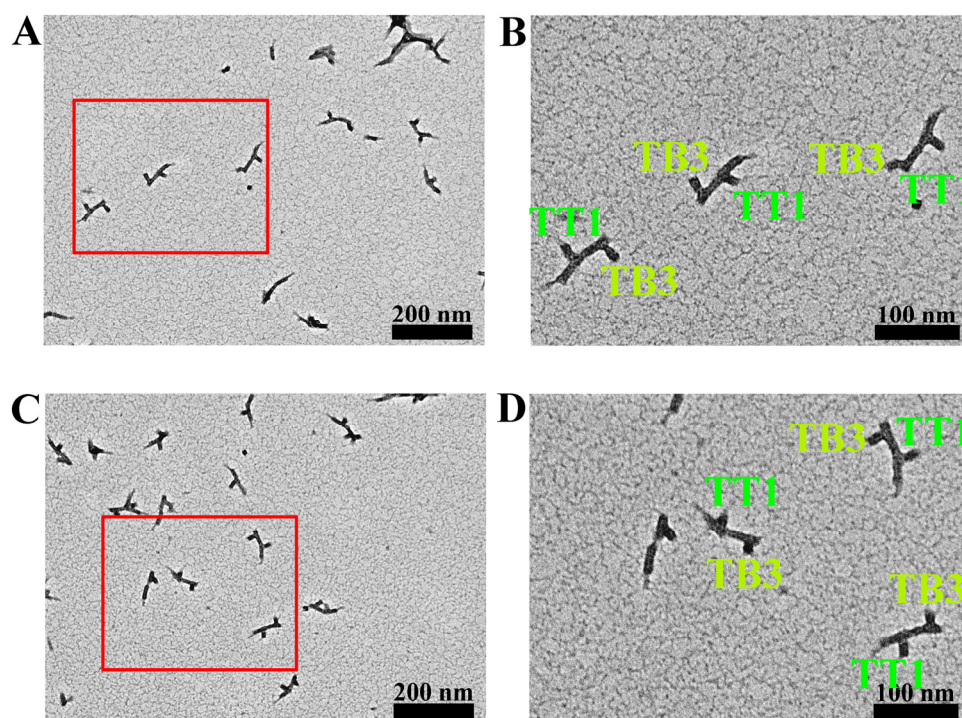

**Figure S38.** Representative TEM images for two-target detection (simultaneous hybridization). DCU, DUT1, and DUB3 in the presence of both TT1 and TB3 (HP for DCU-DUT1-DUB3: 76%). B) and D) are enlarged view images of A) and C), respectively. HP was determined by calculation from ~200 DCU. The concentrations of TT1 and TB3 are 300 nM.

## 14. DNA Sequence Information

**Table S1.** Probe and target sequences

| Name                   | Sequence (5'-3')           | Length |
|------------------------|----------------------------|--------|
| CU TT1 capture probe   | GGCTTCTAAAG                | 11     |
| CU TT2 capture probe   | AACGGCAGGAA                | 11     |
| CU TB1 capture probe   | GAATTATGAGT                | 11     |
| CU TB2 capture probe   | GCAAGGGTCAC                | 11     |
| DCU TB3 capture probe  | CGATGTGTCGC                | 11     |
| DUT1 detection probe   | GGTTGTTGGATTCA             | 15     |
| DUT2 detection probe   | GGCTGGCAGGATGCT            | 15     |
| DUB1 detection probe   | GTCGGTTCACGGAGC            | 15     |
| DUB2 detection probe   | GACCGAGTTACTGTT            | 15     |
| DUB3 detection probe   | GCAGCTCGTGGACCA            | 15     |
| DCU linker-1 on CU     | TAAGAGCTATGGG              | 13     |
| DCU linker-2 on CU     | CAACAGAGGCAGA              | 13     |
| DCU linker-1 on cuboid | CCCATAGCTCTTA              | 13     |
| DCU linker-2 on cuboid | TCTGCCTCTGTTG              | 13     |
| TT1                    | CTTTAGAAGCCTGAAATCCAACAACC | 26     |

|             |                            |    |
|-------------|----------------------------|----|
| <b>TT2</b>  | TTCCTGCCGTTAGCATCCTGCCAGCC | 26 |
| <b>TB1</b>  | GCTCCGTGAACCGACACTCATAATTC | 26 |
| <b>TB2</b>  | AACAGTAACTCGGTCGTGACCCTTGC | 26 |
| <b>TB3</b>  | TGGTCCACGAGCTGCGCGACACATCG | 26 |
| <b>RTT1</b> | CUUUAGAAGCCUGAAAUCCAACAACC | 26 |

**Table S2.** DNA sequences for the assembly of nanostructures (the sequences used for each nanostructure is marked in the corresponding color: **CU**, **PCU**, **CU for DCU**, **cuboid for DCU**, **DUT1**, **DUT2**, **DUB1**, **DUB2**, **DUB3**)

| Name | Sequence (5'-3')                    | Length |
|------|-------------------------------------|--------|
| 1    | CCGCTTCCTTTTTTTTTTTTTTTTTTTGTGCTTGC | 32     |
| 2    | TTGACACCTTTTTTTTTTTTTTTTTTTGGTTCGGA | 32     |
| 3    | ACGCGGCCTTTTTTTTTTTTTTTTTTTGGTGAGGA | 32     |
| 4    | CCGCTTCCTTTTTTTTTTTTTTTTTTTGGAGCAAG | 32     |
| 5    | GCCACGACGCAAGCACGTATTATGGCGAAGAT    | 32     |
| 6    | GGCTCAGTCCGAACCGAAGGGCTATGATAA      | 32     |
| 7    | CATATCCCTCCTACCGGAAGCGGGAGGATGG     | 32     |
| 8    | CATCCGCTTTGTCCCGGAGGCGGGTGCAGAGA    | 32     |
| 9    | ATTATCCTATGTCCTCGGCCGCGTGAGTTAGA    | 32     |
| 10   | TAACTATTACAATACCGAGATCGAGGTCTTAG    | 32     |
| 11   | CTCATTCTTATCATAGGGATATGGAACTAG      | 32     |
| 12   | GTACCGTCATCTTCGCGGAATTAACCGGGGT     | 32     |
| 13   | AATTAGATCCGGGTCGAGGATAATGGATGTTG    | 32     |
| 14   | TACTACCTCCATCCTCGACGGATGAGTATATT    | 32     |
| 15   | CCACAGATTCTAACTCAATAGTTAATGTCAGA    | 32     |
| 16   | ATCCACGCTCTCGCACTGGCCGGGACGAAGGC    | 32     |
| 17   | GATCCCGTATCGTAATGTCGTGGCATTACGAT    | 32     |
| 18   | AACCCTTACCCCGGTAGGTAGTAGTTGAAAG     | 32     |
| 19   | TTAAATACTAGTTTCATCTAATTGGTAGGGT     | 32     |
| 20   | ATTCGTGAATATACTATCTGTGGGGCAGATG     | 32     |
| 21   | CCCCGTGCGCCTTCGTGTTGTGAAGTTCGAGC    | 32     |
| 22   | AGCCCGTTCTGACATCGGAATCAACAAGTCA     | 32     |
| 23   | TTATTCTTCTTCAACACGGGATCGGGCACAG     | 32     |
| 24   | TGCCGCCACCCTACCATGTGACAAGGTTTGA     | 32     |
| 25   | CGCATCTACATCTGCCATATTTAAGTTTTCAG    | 32     |
| 26   | CGTCCGTACCCGTCCAAAAGGTTGGAGATAG     | 32     |
| 27   | GGACTCTAGCTCGAACCACGAAATAGAAAAGCA   | 32     |
| 28   | ATTAGCCGTGACTTGTGTGCCGACAATGCAGT    | 32     |
| 29   | TCCCTGCGCTGTGCCAAAAGGCTGGATAGAGA    | 32     |
| 30   | GCTTAGCTTCAAACCTTAGGCGTAGTGTGGTG    | 32     |
| 31   | CCTTACCCTGAAAACAAGAATAAGGTATGGG     | 32     |
| 32   | CCAGCACCTGCTTCTTACGGACGCTGACGTA     | 32     |
| 33   | TTACAGCTACTGCATTTAGATGCGGGCGCGAG    | 32     |

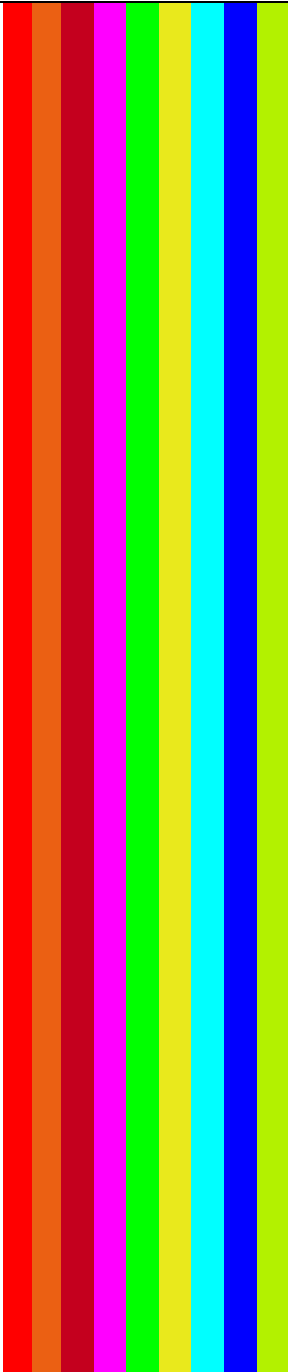

|    |                                                   |    |
|----|---------------------------------------------------|----|
| 34 | TCGTGCCTTGGTCCCATAGAGTCCAGGGCAAG                  | 32 |
| 35 | CGTACAACACCACACGGTAGAGGAAGAGAGG                   | 32 |
| 36 | TCAACCATTCTCTATCGGGTGATAGTGATTAA                  | 32 |
| 37 | ATATAACGTACATTGCAGCTGTAAATTGAATG                  | 32 |
| 38 | CGATTACTCCCATACCGGTGCTGGTGACGAGG                  | 32 |
| 39 | CGATCATGCTCGCGCCAGGCACGAGAACGTGG                  | 32 |
| 40 | CTCCTGCCTACGTCAGGCAATAGCAAACGAAT                  | 32 |
| 41 | AACTCCACTTCTACTCTTGTAGCGAGGCAACG                  | 32 |
| 42 | CATTTATCTTAATCACAGTAATCGCTGCGAAA                  | 32 |
| 43 | TACTCCACCTCTCTTCGTTATATGCGATGTC                   | 32 |
| 44 | GCACTCGCCCTCGTCACATGATCGCGGAGACA                  | 32 |
| 45 | CAATATGTATTTCGTTAACATGGGCTCGGGTT                  | 32 |
| 46 | GTTTCAGACCCACGTTCTTGC GGATAACAAGAGC               | 32 |
| 47 | TCGATCTCTTTTTTTTTTTTTTTTTGGGACAAA                 | 32 |
| 48 | ATTTGCGCTTTTTTTTTTTTTTTTTGAGGACAT                 | 32 |
| 49 | CATAACTTTTTTTTTTTTTTTTTGGCTAGTAGATTGTTGGAGTCAG    | 48 |
| 50 | GCCCTTCCTTTTTTTTTTTTTTTTTGGAGACCAAAGAATGTTGAGCAGG | 48 |
| 51 | ATTTAGCCCGGAGCCCTGTGCTCCTTTTTTTTTTTTTTTGGTATTGT   | 48 |
| 52 | TACTGCCCTTTTTTTT                                  | 16 |
| 53 | CGGAACCTTTTTTTT                                   | 16 |
| 54 | TTAGAACTCCGATACCCGATATCCTTTTTTTTTTTTTTTGGGTCCGG   | 48 |
| 55 | TACTACGTTCCCTCAACGGCTTACGCTCCGCAGTCGTGGCATTACGAT  | 48 |
| 56 | CAATTCATAATATCCATAAATACCACATCCCGGCTGAGCCGAGACGTG  | 48 |
| 57 | TGATTCGCCACAAAACGGCTGCAAGTAGCAAGATGCTGAGTGCCGTAT  | 48 |
| 58 | TTCACAACCTAAGACCGTAGACGTTAGGCGAAAAGTCGAAAAAATGA   | 48 |
| 59 | CAGCCTTTCCTGTATAATGGCTAAGGGGCCAAAAGGATCGTGAGGTCAT | 48 |
| 60 | TACGCCTATTCCAAATGTTCTGAGGGCCGTGAAATGTGAGGCATAAA   | 48 |
| 61 | CACCGCGCGCTTTATACACTTTACTTTTTTACAACGGGCTTGGGACCA  | 48 |
| 62 | CCACTATTTTCGGTCACCTGAACCTTAAGTCCGCACGGGGAACACGAT  | 48 |
| 63 | AAACAATCTACTAGCCGAGTACAGGTGGCAGGCAGCGGGGATCAGAA   | 48 |
| 64 | TATTGCCATACGTCTTATATCTCGCGGTCCCCGGGTCCGCGGGATGT   | 48 |
| 65 | TTAATTCCTTGCTCCGGGTGAATTGCGGGGCACCCAAGGACAGCGGA   | 48 |
| 66 | ACCCCTGATTACCTGTACCCGTAATCCGCCCGGTGTCAACGACCCGG   | 48 |
| 67 | CCCGGCCACCGACCCGGGGCCCTGGGGCCCGAGGTTTTAGAGGTCCG   | 48 |
| 68 | CTGAATACCTATGACCCGAGCCCTAAGTCCGCGCAAATGTTGTGG     | 48 |
| 69 | ACGATCCTTTGGCCCCGGCCGAGATCAAGGGCATAGGGCACTGGGTG   | 48 |
| 70 | CCTAAACTCCTAGACCCCGCCGCTTTAACTGAGAATTGGGGTCAGT    | 48 |
| 71 | TATACCCCTATCTCCTGGCCGAGGATTTAGGGTCGCGGGTAGCGTG    | 48 |
| 72 | CACGCCAGCTATCCGTTACCCGGTCTTCTGGGGCGGCAGCAATGTA    | 48 |
| 73 | GCTATTGCATCGTGTGGAATGGGATCTGGGAACTAGGGATCCGGTA    | 48 |
| 74 | TAACCACAGTCTTACACTAATCTCTGAGTTCCGGCTAATGATGGCAG   | 48 |
| 75 | TTTTTTTGGTTTGTGA                                  | 16 |
| 76 | TTTTTTTGGAAAACG                                   | 16 |
| 77 | TTTTTTTGGGATACT                                   | 16 |

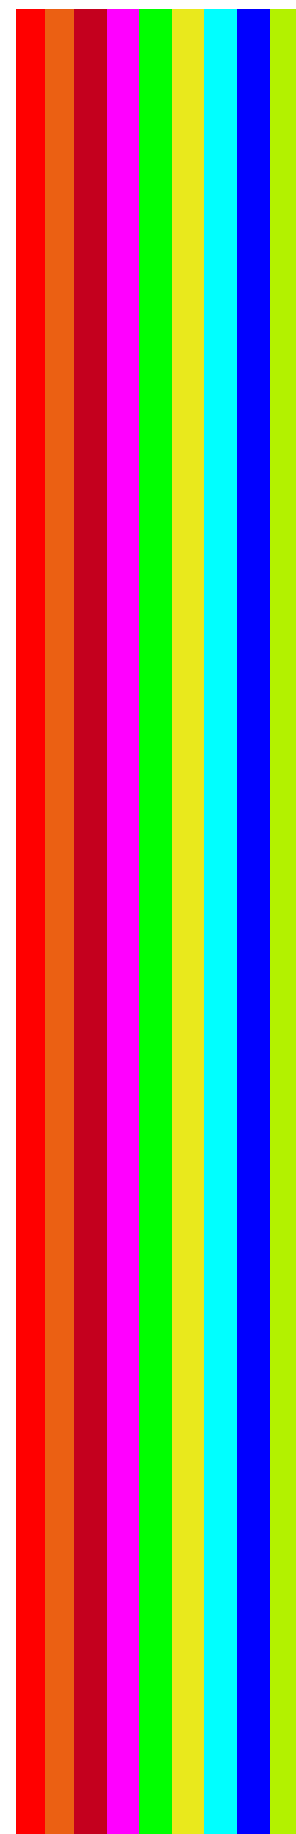



|     |                                  |    |
|-----|----------------------------------|----|
| 78  | ACATTCTTTGGTCTCCGGGCAGTATGCGGAGC | 32 |
| 79  | TTGCAGCCTACAAACCGGAGCACAGGGCTCCG | 32 |
| 80  | ACGTCTACCGTTTTCCGGATATCGGGTATCGG | 32 |
| 81  | TTAGCCATCTGACTCCGTAAGCCGTTGAGGGA | 32 |
| 82  | CTCAGAACCCTGCTCAGGTATTTATGGATATT | 32 |
| 83  | TTCGACTTTTCGCCTAGGCTAAATGTAAAAAA | 32 |
| 84  | TCACATTCACCGGCCACGTAGTATAGGAAAC  | 32 |
| 85  | CATTTCGTCATACGGCAGTAAAGTGATAAAGC | 32 |
| 86  | CTTGACTTTCATTTTTGGTTCAGGTGACCGAA | 32 |
| 87  | TTAACATCAATCACCGCCGGTAACGGATAGC  | 32 |
| 88  | CCGCGACCCTAAAATCGGCAATTGGATACGTA | 32 |
| 89  | CATCTCACAATCACGAGATTAGTGTAAGAC   | 32 |
| 90  | TATGTCTCATGACCTCATGAGTTGTATGGTAT | 32 |
| 91  | CCAAGTTCTTTATGCCGGGCTGGGAGCCGCGG | 32 |
| 92  | CAAACGCCTTGTGTCTGCGCGGTGTGTATTGA | 32 |
| 93  | CCGTCTCTCGTCTCCGGGAGATTGGTGGATG  | 32 |
| 94  | ATACCCCTGCCGTCCGAGACGAAAGACAGAG  | 32 |
| 95  | TCGTCTATCAACTCCGGAACGAAGACACGAG  | 32 |
| 96  | GCAACCAGCGGAACCGGTTTCGTGCAGAAAGT | 32 |
| 97  | CTGGCCTCCGACCTCCGGAGAGCCGTAAGATG | 32 |
| 98  | CAACTAACTACCATCCGGAACAAGCGTGATAC | 32 |
| 99  | TCCCTGTTCTCTGTCTATAGACGATGACAACG | 32 |
| 100 | TTTCTCATCATCCACCGGGGCTCAATGAGGTA | 32 |
| 101 | TCCACGTCCATTTCGAGAGGCCAGGAATCGTG | 32 |
| 102 | GTCCGCACCTCGTGTCTGGTTGCTGGGGGTT  | 32 |
| 103 | TCTCGGAACATCTTACGTTAGTTGTGTGGGAT | 32 |
| 104 | ATCACCTAACTTTCTGTTACAGGGTGCTAGGT | 32 |
| 105 | TCTGGCTCACCAACAAACAGGAAAACGAGGA  | 32 |
| 106 | ATACTCTATACCTCATGTGCGGACGATAGGTG | 32 |
| 107 | CCACACCCGTTGTCAGACGTGGAGAATAGAG  | 32 |
| 108 | TTTTACTAACCCCCATTCCGAGAGTCGATGG  | 32 |
| 109 | CTATATAAACCTAGCAGAGGCGCGGGGTCGG  | 32 |
| 110 | CCCTGGTCATCCACAGAAGGGACGCGGTA    | 32 |
| 111 | TGAACAACCACCTATCGAGCCAGAGGACGGTT | 32 |
| 112 | TACCTGCCCTCTATTCAGTTGGTTGGCGGTCA | 32 |
| 113 | CGATTGCCCCATCGACGGGTGTGGATCGAACC | 32 |
| 114 | ATACCAGCTCTCAGTCTAGAGTATGGAGTGCG | 32 |
| 115 | CTCGACCACCGACCCAGTGAAAAGATATGTG  | 32 |
| 116 | GACTTCCGTTTACCGCGGACACGTAGAGCGC  | 32 |
| 117 | CTTCCATCAACCGTCCAGTGGATAAGGAATAT | 32 |
| 118 | ATAACCTCTGACCGCCACAGTGAGTAGTGAGC | 32 |
| 119 | GCCGTGCCGTTTCGATGTTGTTCAAAGCTGGA | 32 |
| 120 | CCGGTACCCACATATCGCTGGTATGTGTAGTG | 32 |
| 121 | TGCACCTTGCCTCTAGCGAATCGGGAGCTAA  | 32 |

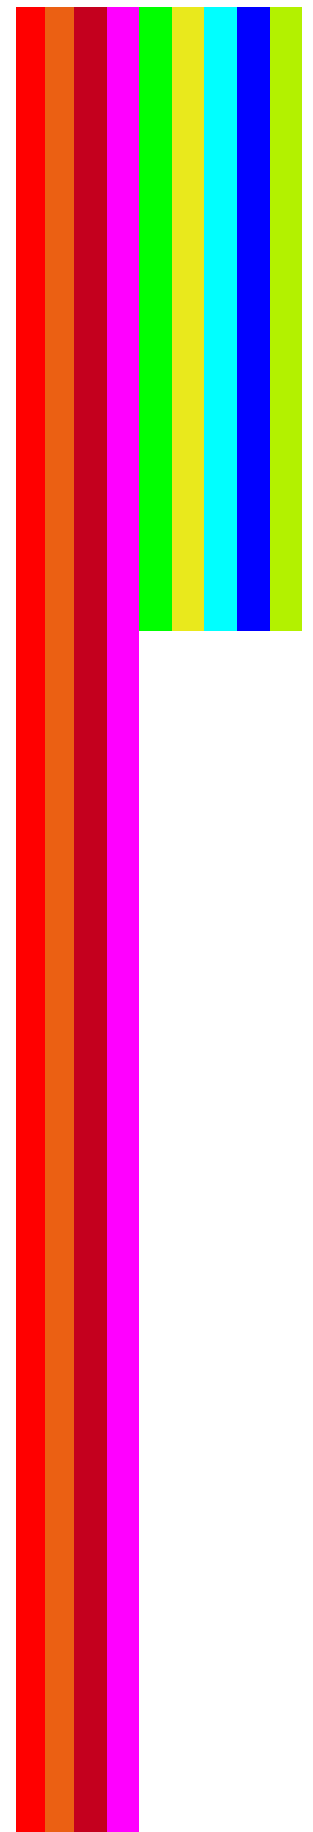

|     |                                                   |    |
|-----|---------------------------------------------------|----|
| 122 | CTTATGCTCTTTAGTCTGGTCGAGGGTTATAG                  | 32 |
| 123 | CGTCCACCGCTCACTAGGCACGGCAAGTGATA                  | 32 |
| 124 | TGTACCCCATATTCCTTGGTAGATAGCAGTCG                  | 32 |
| 125 | CCCGTCAACCTTTAGCAAGGTGCAGTGAATGA                  | 32 |
| 126 | CCTGCGTCTCCAGCTTGGTACCGGGAGACTGG                  | 32 |
| 127 | CGGTCTATTAGCTCCAGCATAAGATTTATAA                   | 32 |
| 128 | CAATCGCGCACTACACAAGGCGACAAGAAGGT                  | 32 |
| 129 | TCCTGGATTCTTACTGGGTGGACGAGCCGGGT                  | 32 |
| 130 | TCGCTTCTCGACTGCTGACGCAGGAAGCTGTT                  | 32 |
| 131 | TGCATTCATATCACTTTTGACGGGGACGTAA                   | 32 |
| 132 | TGCAATCCCCAGTCTCTAGGACCGAGGGGCGA                  | 32 |
| 133 | TTCAAGCCTTATAAATAAGGGTGTCGCATGA                   | 32 |
| 134 | TTTTTTTTTCATGCGAGTGGGGTGTTTTTTT                   | 32 |
| 135 | ACCCGTAAACCTTCTAATGATAGGCAAGCGG                   | 32 |
| 136 | TTTTTTTTGCCATCGCAGAAGCGATTTTTTTT                  | 32 |
| 137 | TTTTTTTTCCGCTTGCGGATTGCATTTTTTTT                  | 32 |
| 138 | TGGAATCTCCGTCACGTTTAAGGGGACGTCGGACAACAGAAAAATAA   | 48 |
| 139 | TTTTTTTTTACGTCCGTCAAATCTTTTTTTT                   | 32 |
| 140 | TTTTTTTTAACAGCTTATCCAGGATTTTTTTT                  | 32 |
| 141 | TTTTTTTTACCCGGCTGTTTGCGGTTTTTTTT                  | 32 |
| 142 | TTTTTTTTTAATCTATGGCTTGAATTTTTTTT                  | 32 |
| 143 | AATCTCCCTCGTTCACGAGACATAGGGACCCGAAGTTTGATAATAGAT  | 48 |
| 144 | TTCTGCTCCGTTGCTGAACTTGGGGAACCAAGAGTCATAAGGGTCTT   | 48 |
| 145 | CATTGACCCACGCTACCGAGGTACGGACATTG                  | 32 |
| 146 | CATGAACCGCAACCTGTGGGCGTGGGTTAAAT                  | 32 |
| 147 | TGTACACCTACCGGATGCGCGGATGGTGAACA                  | 32 |
| 148 | CCACGCGCCAGTTTCTTGATTGCCACCCGACGTGTGGTTAGGTTACAG  | 48 |
| 149 | TTACTGACACACAGCACACGGGCCTCAATACAGTCTGAACGGATGGTA  | 48 |
| 150 | GCGTCGCATTGCACTGTGACCTTCACTTCGTAACATATTGGGCCCGGG  | 48 |
| 151 | CGTATTTCCACCCAGTGCCTATGCCCTTGATGGGGCGCTGCAGGATG   | 48 |
| 152 | CGACACCCATACCATACTCATGTTTCTACGCAGGGAGAGTAGAA      | 48 |
| 153 | ATGCATCCCCGCGGCTCCAGCCACTGACCCAGCTAAGCCAGGTCAG    | 48 |
| 154 | ATCCGCAACTGCCATCGACGAATGACGTGTGGCACGCGAAGACAGTTG  | 48 |
| 155 | CCCATGTTCTTGCCCTAAGTCAAGAGACACAAGGCGTTTGGGTCGACG  | 48 |
| 156 | CCCTAGTCCCAGATCTTGCAAGCTACGGGCGATCGGAAGGAGTTGCA   | 48 |
| 157 | GTCTTGGCCTGACCTGGATGTTAAGTGACGGAGGATTCCAGGTGTCTA  | 48 |
| 158 | CCAGCGACCAATGTCCGTACCTCGCATCTGCATGGTTGAGTGAACGA   | 48 |
| 159 | TGTGTCCACATTCAATGTGAGATGCAGGTTGCGGTTTCATGATGCACAG | 48 |
| 160 | TCGTTCTATGTTACCATCCGCGCTACGTATCGGCAGGAGCCAACGGT   | 48 |
| 161 | TTCCGCTGCCACACGTACGCATGGCGTCCGGTGGCAATCAAGAACTG   | 48 |
| 162 | CTGTAACTGCAACTCCTTCCGATCGCCGTAAATAGTGGTACGAAGT    | 48 |
| 163 | TTTTTTTTTCGCCCTTGAATGCATTTTTTTT                   | 32 |
| 164 | TTCTGTTCTTTTCGAGGTGGAGTTGGAAGACG                  | 32 |
| 165 | CACTGTCCGACATCGCGCCAAGACGGACGGCA                  | 32 |

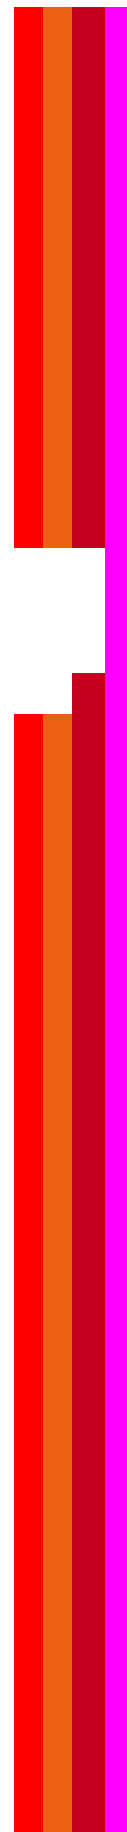

|     |                                                   |    |
|-----|---------------------------------------------------|----|
| 166 | GGCTCTCCTGTCTCCGTGGAAGTAGGAAGTTG                  | 32 |
| 167 | CACGAACCACCGTTGGGATAAATGGGAGTGTT                  | 32 |
| 168 | CTTGTTC AACCCGAGGCGAGTGCGGTTCCGCG                 | 32 |
| 169 | AGTTCTCCGCTCTTGTGGACACAGGAGGTCG                   | 32 |
| 170 | CACAAGCCACATGACTTCTGTCAAACGTCACAAGAGACGGTGGGTGGT  | 48 |
| 171 | GTATCTCAAAAACACTATAATTGCTCATCGCGTCGGGGTATTAGGGGAT | 48 |
| 172 | GTCCCTTCTAGCCTTCACTAATGTATATGTTGTGCGGCGTAATATGCT  | 48 |
| 173 | CGCGCCTCGTATCACGATCGATGATCTGTAGAACAATGACATGGATCA  | 48 |
| 174 | TATCCACTACCCCTTGAATTGGCAGCCGGTCGGCTGATTTAAAGTATA  | 48 |
| 175 | CTCACTGTTCCCTCGTTGAGGCCTGTCGGTTGTCGAACGATGGTTATTG | 48 |
| 176 | TTTTTTTTGCCTTAATAGCCTGTAGCCCAGACGATGGAAGCAGTAAGA  | 48 |
| 177 | TTTTTTTTAGCCGTCAGGTTCCCGTGGCCCGGAGGTTATGGGTTTAG   | 48 |
| 178 | GGTCTTTTGTTCGTCGGCCGCCGGCGTTTGTGACCAGGGGACTAAAG   | 48 |
| 179 | TCGTATAACATTACTTGAGCTACATGCTACACTTATATAGATGGATTA  | 48 |
| 180 | TCAAACCTCGGGTCCCGGAATACGGAATTCGGGATTCAGAGCTCAGGG  | 48 |
| 181 | TCAACACATTATTTTTCTGTTGTCGACGTCGGATGCATGACGCGAT    | 48 |
| 182 | TGAGCCCCAACACTCCGGTCAATGTGCAAAAGGCCATAGGCCGCTGGA  | 48 |
| 183 | CGCTATTTACTCAGTGCTCTATGCATTTAACCGGACAGTGTGCGAATG  | 48 |
| 184 | CCCTGTAACCCGGGCCGGTGTACAGAGTACTGAAATACAGAACGCTGT  | 48 |
| 185 | TTGTTATCTGTTTTCTTCGAGACCCGTAACCGGAGAACTGAAGGCTA   | 48 |
| 186 | AAATCAGCCGACCGGCACCTGATGAATAGTAAAATGTCGGATGTCTGG  | 48 |
| 187 | ACATCGGTCGCCGATCTTAGTTTATCGTTTATTGAGATACGCGGGCCA  | 48 |
| 188 | ATCTACCACGCACTCCCATCAGTGATCAGTAGGCCACTAGGATCCAGT  | 48 |
| 189 | CTCCGCACTACTGTCTATAGTCCGCGTTTGGCAGGTAGCTAAAGG     | 48 |
| 190 | GTCGCCTTAAATCCATATGCTAATTGAGTACCAGGATACCTGGTACT   | 48 |
| 191 | GTACCTTGAGTCTGTTACCGTATACTGTATCCGGAAGTCGGGAAGCC   | 48 |
| 192 | TATGACTCTTGGTCCGGGTGTCGTGTGACGT                   | 32 |
| 193 | ACATTAGTCAACTGTCGGCCCGTGTGCTGTGT                  | 32 |
| 194 | TCATCGATCGTCGACCGAAGGTCACAGTGCAA                  | 32 |
| 195 | TGCCAATTATCTATTATTGACAGAAGTCATGT                  | 32 |
| 196 | CAGGCCTCAAGACCCTGAGCAATATAGTGTTT                  | 32 |
| 197 | GTCATTGTTCTACAGAGTCAGTAAACAAACGG                  | 32 |
| 198 | ATCGTTCGACAACCGAGGCTTGTGGTCTGGGC                  | 32 |
| 199 | ATACGCCAAGCATATTCGGCGGCCGACGAAC                   | 32 |
| 200 | GCAGCCAATGATCCATTGTAGCTCAAGTAATG                  | 32 |
| 201 | TAATTTATTATACTTTTACAGGCTATTAAGGC                  | 32 |
| 202 | CCGCAAACCAATAACCCGGAACCTGACGGCT                   | 32 |
| 203 | GTGCGTCACGCAGCTAAAAAGACCATAGATTA                  | 32 |
| 204 | TTTTTTTTACTGGATCAAATTAAGTTTTTTTT                  | 32 |
| 205 | TTTTTTTTACTCGTCGTGCGGAAGTTTTTTTT                  | 32 |
| 206 | TTTTTTTTTATATCCTATAAAATTTTTTTTT                   | 32 |
| 207 | ACACCCTTGGCTTCCCTGGCGTATGTCGATTGACGATTGTTTTTTTT   | 48 |
| 208 | TTTTTTTTACCACGTAACCGATGTTTTTTTT                   | 32 |
| 209 | TTTTTTTTCTCTAGTCCAAGTACTTTTTTTTT                  | 32 |

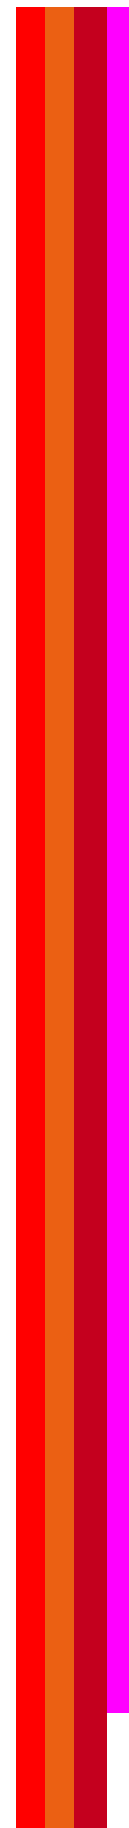

|     |                                                              |    |
|-----|--------------------------------------------------------------|----|
| 210 | GGCTTCTAAAGCTCCGGCCTTCTGATCCCCGCTGCCTGCCACCGAGCGCTGAGAACCGT  | 59 |
| 211 | GGCTTCTAAAGCAGCGCTCCAAGTCCC                                  | 27 |
| 212 | GGCTTCTAAAGAGCGCCCCGTA CTACATACATCCTACGGTTCTGACGGTACTATACAGG | 59 |
| 213 | GGCTTCTAAAGATTACCCCTTTTTTTTTTTTTTTTTTTGGGACTTG               | 43 |
| 214 | GGCTTCTAAAGCCTTGGGTGCCCCGAGGACAAGCAGCGTGCG                   | 43 |
| 215 | GGCTTCTAAAGCTCGGCCATCCGCTGTAGGATGTATGTAGTAC                  | 43 |
| 216 | GGCTTCTAAAGGCTTGTCATCGGCC                                    | 27 |
| 217 | GGCTTCTAAAGCAATTGCCGCTAGCCCCGAGTCCCGCACGCTGCGTGGATTGGACGGG   | 59 |
| 218 | GGCTTCTAAAGTAAAACCTCGGGCCCCGGGCAGCTGGCGGCGAACGGGAGTCCGGCGAT  | 59 |
| 219 | GGCTTCTAAAGCCATTCCACGGACCTCGGACTCGGGGGCTAGC                  | 43 |
| 220 | GGCTTCTAAAGAGCTGCCCAGTATCCC                                  | 27 |
| 221 | GGCTTCTAAAGGCTTGCAAATCGCCGACTCCCGTTCGCCGCCAGTTCTAAGGACTTAA   | 59 |
| 222 | CGAGATATAAGACGTA                                             | 16 |
| 223 | GGCTTCTAAAGAGGCCCCCTTTTTTTTTTTTTTTTTTTGGGCCGAT               | 43 |
| 224 | GGCTTCTAAAGTGTACTCCTTTTTTTT                                  | 27 |
| 225 | CCCGCCCTTTTTTTTTTTTTTTTTTTGGGGACCGGAATTATGAGT                | 43 |
| 226 | CCTACCGACTCATAATTGGCAATAAGTTAAAAGCGGCGGGTCTAGGAGAATTATGAGT   | 59 |
| 227 | GGGGCGGGAATCTAGGGAATTATGAGT                                  | 27 |
| 228 | TGTCACATCACGTCTCTGCCAGGGATTATGAGTCGGTAGGCGGTGATTGAATTATGAGT  | 59 |
| 229 | CACAGCCCTTTTTTTTTTTTTTTTTTTGGGCGGATGAATTATGAGT               | 43 |
| 230 | CCCTGGCACCTAGATTTACGGGTGACAGGTAAGAATTATGAGT                  | 43 |
| 231 | ACCAGCCACCAGTCACTCAGGGTCCAGAAGAGAATTATGAGT                   | 43 |
| 232 | GGGCTGTGGAGCATTGGAATTATGAGT                                  | 27 |
| 233 | GTCGGCACCAACATCCGGATAACGGTGACTGGTGGCTGGTCGTGATTGAATTATGAGT   | 59 |
| 234 | GCGGCCACAAATTTCCAGCATTCCTTTTTTTTTTTTTTTTGGAACTAGAAATTATGAGT  | 59 |
| 235 | CGTTATCCCAATGCTCGGGCTGCGGGTCATAGGAATTATGAGT                  | 43 |
| 236 | CCATGCGTCTACAGCCTGCGACCTACGACCTGTATTCAGGAACTCAGGAATTATGAGT   | 59 |
| 237 | GGAATGCTGGAAATTGGAATTATGAGT                                  | 27 |
| 238 | CTCAGCATCTTGCTACTGGGCCGAGGTCGTAGGTCGAGGCTGTAGGGAATTATGAGT    | 59 |
| 239 | AACGGCAGGAACTGAATCCCGAATTCGTCGCTGGCTGACAGC                   | 42 |
| 240 | AACGGCAGGAAATTTTTTCCAGACATCCGACATTTTACTATTTGAGACCTGTGGCCAG   | 59 |
| 241 | AACGGCAGGAAAGGTCTCACGTTTCATGGCTTTCAGCTGTCAGATGAGAAAACAAGGGGT | 59 |
| 242 | AACGGCAGGAACTTAATTTCTGGCCACGGGGTACAAGGATATA                  | 43 |
| 243 | AACGGCAGGAACCTATGGCCTTTTGCATAGAACGACAGATGAT                  | 43 |
| 244 | AACGGCAGGAACTGATGTCCAGCGGTGAAAGCCATGAAACG                    | 43 |
| 245 | AACGGCAGGAACTAGTGGCCTACTGATGAGATCTAAAGTTTAC                  | 43 |
| 246 | AACGGCAGGAATAGATCTCAGATCTTTGATCATATATCATCTGTAGGTGATGACTGAGA  | 59 |
| 247 | AACGGCAGGAATGCGATCCGTAAACTTCGCGATTGGCGATGGC                  | 43 |
| 248 | AACGGCAGGAACATCAGGTCCCTGAGC                                  | 27 |
| 249 | AACGGCAGGAAATTAGCATAACGCGTTATATGATCAAAGATCT                  | 43 |

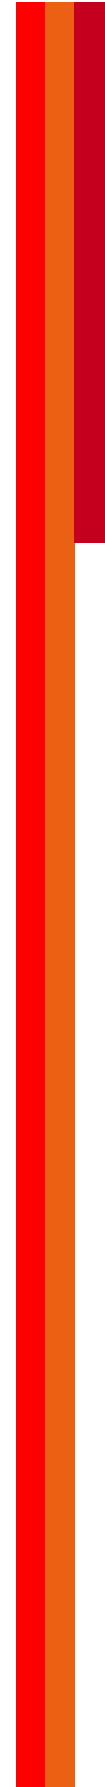

|     |                                                             |    |
|-----|-------------------------------------------------------------|----|
| 250 | AACGGCAGGAACGTTTTACGACAAACTACAGTCCACTGGCCGTTGCGACGCGTGTAGCA | 59 |
| 251 | AACGGCAGGAACTCAAAGTCCGATTATTATACGAATTAGAGA                  | 43 |
| 252 | CCAGATACCAAGTACCTGTGTTGAATAAACGAGCAAGGGTCAC                 | 43 |
| 253 | AACCAACTATCCCCTAGAAAATTAGGTACTTGGTATCTGGATGCCCGGCAAGGGTCAC  | 59 |
| 254 | GATTTGACCTAAACCCAAATGCGGTACGTGGTGCAAGGGTCAC                 | 43 |
| 255 | TAATTTCTAGACACCGCATAGAGCACTGAGTGCAAGGGTCAC                  | 43 |
| 256 | GCTCGACGCTTAACGCAAATAGCGAAACGCGGGCAAGGGTCAC                 | 43 |
| 257 | CCGCATTCGCGGCATACTATAGACAGTAGACGCAAGGGTCAC                  | 43 |
| 258 | CGTGTCACGATTCAATACTGAGCGTTAAGCGTCGAGCGCCGGCAGCAAGGGTCAC     | 59 |
| 259 | CACCCCACTATTCACTTGAAAAACGACGAGTGCAAGGGTCAC                  | 43 |
| 260 | TCAGTATTCTGTGCATGGTCTCGAAGAAAACAGCAAGGGTCAC                 | 43 |
| 261 | ACAAGTTTCGGCGCCCAACGTGCACCATTGCGGATAACAAGATACAGTGCAAGGGTCAC | 59 |
| 262 | TTTTCAATGCCCGGCATACGGTAACAGGACTGCAAGGGTCAC                  | 43 |
| 263 | TAAACTAAGATCGGCGGCAAGGGTCAC                                 | 27 |
| 264 | ACAATCGTCAATCGACAAACTTGTGACTAGAGGCAAGGGTCAC                 | 43 |
| 265 | TGGAATCCTCCGTCACGTTTAAGGGGACGTCGGACAACAGAAAAATAAGCAAGGGTCAC | 59 |
| 266 | AACGGCAGGAAGGTATCTGGTACTCAGTAAAACGTAAATCGGACTTTGAGGCGGACAG  | 59 |
| 267 | TCCTCATCTCCTTCAGATGAAGAGTAAGGAG                             | 32 |
| 268 | AACCTACTATCTTCTAGAGAGCAAAGAGTTCG                            | 32 |
| 269 | AACTGTTTCGATTCATAGGCAGTGGCAAAGAT                            | 32 |
| 270 | TTTTTTTTCGAACTCTGGGGTGGATTTTTTTT                            | 32 |
| 271 | TTTTTTTTTATTTCCCGATGAGGATTTTTTTT                            | 32 |
| 272 | TTTTTTTTATCTTTGCAGTAGGTTTTTTTTT                             | 32 |
| 273 | CTTCTCCCCGCTTGCGGATTGCAGGGAAAAGCTCTAAGTCGTATGCC             | 48 |
| 274 | ATCACACCAGTAACCAGGATCGCAGGGAGGCAGAGGGAGTTAAGAGGT            | 48 |
| 275 | CCCCCTCTTCTCACCTCCCTTACTCTCTAATTAACGGGTGAGAGGAT             | 48 |
| 276 | CCCTCCCCGGCATACTAGACTTAGAGCTTTCCCGGGGGGCAAAGGGGAG           | 48 |
| 277 | TCAATCCTGTCCCGTCTAATCATTACCTTTTCGTAAGGGAGGTGAGAA            | 48 |
| 278 | CCTACCTTCTTCCCATCCCTTTCTCCCTTAGGAGGTTGGTAAAAG               | 48 |
| 279 | ATTTCTCGCTCTTCGGAATGATTAGACGGGACAGGATTGAAGAACGGC            | 48 |
| 280 | TCTCTCCATTTCTTTACTGATTGGGGTTAAGGATTAGGACTTTGCAG             | 48 |
| 281 | CCCCACCCTTTTACCCGAGAAATATGAGAGTTATGATTGGGTAAGCA             | 48 |
| 282 | CAATCATAACTCTCATGGGGAGGGCTTATTAGGAGCGGGTTGAAGGG             | 48 |
| 283 | CTCTTACACCTTTTCAAGGTGGGACGGAGAGGGTGAGTGTGAAAGGA             | 48 |
| 284 | CACTGCCTTCCAACGCTCTTTTCCCTCACTTGGTGGGGGAATGTAG              | 48 |
| 285 | TCCACCCCCCTTCAACCCGCTCCTAAAATAAGAAGGTAGGAAGTGAAG            | 48 |
| 286 | TACCCTTCGCAACCACTTGTCTCGCGTTCTGAAAGAGAGCGTTGGA              | 48 |
| 287 | TTTTTTTTCTCCTTACTTTCATCCTTCACTTGGAGCAGATAGAAGAT             | 48 |
| 288 | TTGCTCTGTGCTTACCGAGACAAGTGGGTTGCGAAGGGTATTTTTTTT            | 48 |
| 289 | ATCACTTACTTTCCAAGCAGTGCATGAATCGAAACAGTTTTTTTTT              | 48 |

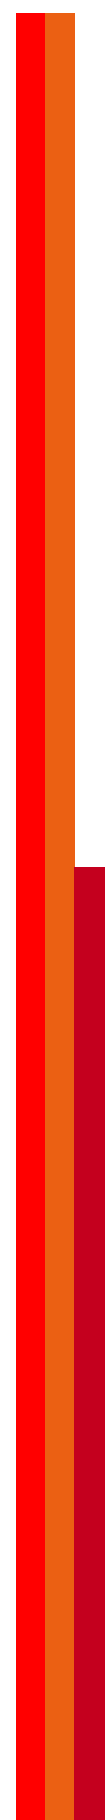

|     |                                                   |    |
|-----|---------------------------------------------------|----|
| 290 | CTATCATTCTATAACCTTGGCTGCTAGCTGCGTGACGCACGAAAGGTA  | 48 |
| 291 | TGCCCCCGCCATCGCAGAAGCGATTTTTTTT                   | 32 |
| 292 | ACCCGTAACTTCTTAATGATAGGCAAGCGGGGAAGCCGAAGAG       | 48 |
| 293 | AACCTCCTATCCTCTCGGTGTGATAAAGGAAATGGAGAGAGAAAAGGT  | 48 |
| 294 | CACTCACCTCTCCGTCCACCTTACCTCTTAAAAGGGATGGGGAAGG    | 48 |
| 295 | GCACTGCTCTGCAAAGTCCTAATCCTTAAACCCGAGGGGGGAGTGAGGG | 48 |
| 296 | TCTGCTCCCTACATTCGTAGAGAGTGGAAGTAGAGTGATGGGAAATA   | 48 |
| 297 | ACTCCCTCTGCCTCCC                                  | 16 |
| 298 | ACTCCCTCTGCCTCCC                                  | 16 |
| 299 | GGTATCTGGTACTCAGTAAAACGTAAATCGGACTTTGAGGCGGACAG   | 48 |
| 300 | GCATAGCTTTTTTTTTTTTTTCTCTGGGTATAAGTGTAGGCGATA     | 48 |
| 301 | TACCTGAGTCTCAAGCTGCTGATATTTTTTTTTTTTTTTGGGGGAT    | 48 |
| 302 | GTTGCCAGTCGTCTGCCGGCTACCTTTTTTTTTTTTTTTGGGTTTG    | 48 |
| 303 | ATTACCGATTGCGACAGGGCTTTGGGCTTCGAATGTCTAAGCGCATGT  | 48 |
| 304 | CGTAATCAAAGTTGTCTACGGCCCCGACCTGCCTATAAAAAGAGGGG   | 48 |
| 305 | TTTGCTGTGTCTGCGAGCCATATGTCACTAGAGTACGAGTTCATCG    | 48 |
| 306 | CGGAAATCGTACTAATGCGTGCTGCGCGCGCAACGGTTTTTTTT      | 48 |
| 307 | TCCCTAACCAAAACCCGACTATGCTGTGCGAA                  | 32 |
| 308 | ACTCCCTCTGCCTCCCCTAAAGCCGGAAGTGG                  | 32 |
| 309 | CAATCAGTCTGTCCGCGGTAGCCGGCAGACGA                  | 32 |
| 310 | GCTACCGCTATCGCCTAGAGGCCGAATGCGTG                  | 32 |
| 311 | TCGTACTCGGTTCCAGTGGAGAGAGAAAAGGT                  | 32 |
| 312 | TTAGACATTGGAAGCCCTGGCAACTAGTGACA                  | 32 |
| 313 | GTCGAATCCGATGAACGTCTGGCGTTAGTAAC                  | 32 |
| 314 | CACTCACCTCTCCGTCAAGATCAGGATCAAT                   | 32 |
| 315 | GCACTGCTCTGCAAAGTATGGCTCGCAGAACA                  | 32 |
| 316 | CCGGCGTGCAACCGCCAGAGTGATGGGAAATA                  | 32 |
| 317 | TACGCGACTTTTTTTT                                  | 16 |
| 318 | GGCTTTAGTTTTTTT                                   | 16 |
| 319 | TTTTTTTTGGTGCCG                                   | 16 |
| 320 | GCACTAGCATCCCCC                                   | 16 |
| 321 | AACCTCCTATCCTCTCGGTGTGATAAAGGAAA                  | 32 |
| 322 | CCCACCTTACCTCTTAAAAGGGATGGGGAAGG                  | 32 |
| 323 | TCCTAATCCTTAAACCCGAGGGGGGAGTGAGGG                 | 32 |
| 324 | TCTGCTCCCTACATTCGTAGAGAGTGGAAGT                   | 32 |
| 325 | CGTGCTCACACATGCCGGCATCAGAGTTTGGG                  | 32 |
| 326 | GCCTCAGTTATCGACCGATTCCGACTGTTCAT                  | 32 |
| 327 | CCGTTGCGCGCCGCGCCAGACAAAAAGCATT                   | 32 |
| 328 | TTTTTTTTATGACAGTTGAGCACGTTTTTTTT                  | 32 |
| 329 | TTTTTTTTTAATGCTTACGCCGGTTTTTTTT                   | 32 |
| 330 | TTTTTTTTTCTGCGTTACTGAGGCTTTTTTTTT                 | 32 |
| 331 | ACACTTATACCCAGAGGTCGCGTAACCGTGTGCGAGAAGGAGTGGCTA  | 48 |
| 332 | CAAAGCCCCGGACACCTATCAGCAGCTTGAGACTCAGGTACAGGTCCG  | 48 |
| 333 | TGATCTTGACGCATTCCGCTCTCCAGTTCGGTTAGGGACTGGAACC    | 48 |

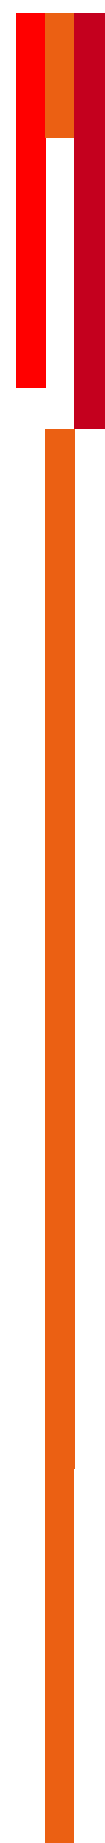

|     |                                                   |    |
|-----|---------------------------------------------------|----|
| 334 | TCTCTACTAGCCACTCCTTCTCCGACACGGTGCTAGTGCTAAAAGGA   | 48 |
| 335 | TTTGACGCCCCCTCTTTTTATAGGTCCTTTTATCGGTAATTTGAGCGC  | 48 |
| 336 | CGCCAGACGCGCTCAAGCGGTAGCGGGGCTGAAGACTAAGGGCATGTG  | 48 |
| 337 | CTTAGTCTTCAGCCCCGTGAGAGATGGTGGTAGGTGTATGAGGGTCAA  | 48 |
| 338 | AGCACGCAACATGCGCGGCCGTAGACAACCTTTTGATTACGAACGCAGA | 48 |
| 339 | TTTTTTTTCCCAAACCTCTGATGCCATTGATCCGATTCGACGGCGGTTG | 48 |
| 340 | TTTTTTTTTGACCCTCATAACCTACCACCAGCGTCAAAGGTCGATA    | 48 |
| 341 | GGTATCTTGGTACTCAGTAAAACGTAAATCGGACTTTGAGTTTTTTTT  | 48 |
| 342 | CATCAGGTCCTGAGCTCTGAATCCCGAATTCGTCGCTGGCTGACAGC   | 48 |
| 343 | CTGTATTTCACTACTCGTTAACAGACGGCCAGTGGACTGTAGTTTGTC  | 48 |
| 344 | CCAGATACCAAGTACCTGTGTTGAATAAACGATAAACTAAGATCGGGC  | 48 |
| 345 | TTTTTTTCCAGACATCCGACATTTTACTATTTGAGACCTGTGGCCAG   | 48 |
| 346 | ACAAGTTTCGGCGCCCAACGTGCACCATTGCGGATAACAAGATACAGT  | 48 |
| 347 | AACCAACTATCCCCTAGAAAATTAGGTACTTGGTATCTGGATGCCGCG  | 48 |
| 348 | AGGTCTCACGTTTCATGGCTTTCAGCTGTCAGATGAGAAACAAGGGGT  | 48 |
| 349 | CGTGTCCACGATTCAATACTGAGCGTTAAGCGTCGAGCGCCGGGCA    | 48 |
| 350 | TAGATCTCAGATCTTTGATCATATATCATCTGTAGGTGATGACTGAGA  | 48 |
| 351 | ACGCCGCACAACATATGCGCGTGGCGCAATGGTGCACGTTGGGCGCCG  | 48 |
| 352 | CGTTTTACGACAAACTACAGTCCACTGGCCGTTGCGACGCGTGTAGCA  | 48 |
| 353 | TAATTTCTAGACACCGCATAGAGCACTGAGT                   | 32 |
| 354 | CCTATGGCCTTTTGCATAGAACGACAGATGAT                  | 32 |
| 355 | TCAGTATTCTGTGCATGGTCTCGAAGAAAACA                  | 32 |
| 356 | CACTGATGTCCAGCGGTGAAAGCCATGAAACG                  | 32 |
| 357 | GCTCGACGCTTAACGCAAATAGCGAAACGCGG                  | 32 |
| 358 | ATTAGCATACAGCGTTATATGATCAAAGATCT                  | 32 |
| 359 | CCGCATTCGCGGCATACTATAGACAGTAGAC                   | 32 |
| 360 | CTAGTGGCCTACTGATGAGATCTAAAGTTTAC                  | 32 |
| 361 | TTTTTCAATGCCCGGCATACGGTAACAGGACT                  | 32 |
| 362 | GATTTGACCTAAACCCAAATGCGGTACGTGGT                  | 32 |
| 363 | CTAATTTCTGGCCACGGGGTACAAGGATATA                   | 32 |
| 364 | CACCCCACTCATTCACTTGAAAAACGACGAGT                  | 32 |
| 365 | TGCGATCCGTAAACTTCGCGATTGGCGATGGC                  | 32 |
| 366 | ACAATCGTCAATCGACAAACTTGTGACTAGAG                  | 32 |
| 367 | CTCAAAGTCCGATTTATTATACGAATTAGAGA                  | 32 |
| 368 | CCCCCCCTTTTTTTTTTTTTTTTTGGGGACCGCGAGATATAAGACGTA  | 48 |
| 369 | GCGGCCACAAATTTCCAGCATTCCTTTTTTTTTTTTTTTGGAECTTA   | 48 |
| 370 | CCTACCGACTCATAATTGGCAATAAGTTAAAAGCGGCGGGGTCTAGGA  | 48 |
| 371 | CCATGCGTCTACAGCCTGCGACCTACGACCTGTATTACAGGAACTCAG  | 48 |
| 372 | TGTCACATCACGTCTCTGCCAGGGATTATGAGTCGGTAGGCGGTGATT  | 48 |
| 373 | GTCGGCACCAACATCCGGATAACGGTGACTGGTGGCTGGCTCGTGATT  | 48 |
| 374 | CTCAGCATCTTGCTACTGGCCGCAGGTCGTAGGTCGCAGGCTGTAGG   | 48 |
| 375 | GGGGCGGGAATCTAGG                                  | 16 |
| 376 | GGGCTGTGGAGCATTG                                  | 16 |
| 377 | GGAATGCTGAAATTG                                   | 16 |

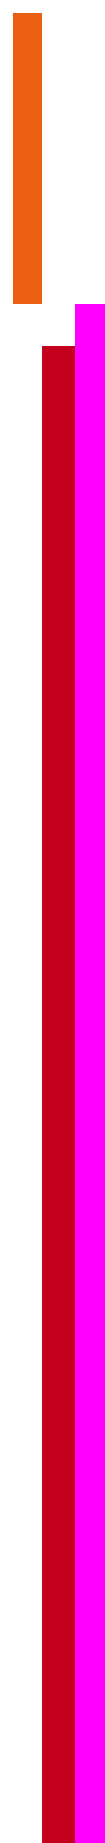

|     |                                                              |    |
|-----|--------------------------------------------------------------|----|
| 378 | CACAGCCCTTTTTTTTTTTTTTTTTGGGCGGAT                            | 32 |
| 379 | ACCAGCCACCAGTCACTCAGGGGTCCAGAAGA                             | 32 |
| 380 | CCCTGGCACCTAGATTTACGGGTGACAGGTAA                             | 32 |
| 381 | CGTTATCCCAATGCTCGGGCTGCGGGTCATAG                             | 32 |
| 382 | CATAATACTAAGAGCTATGGGTTTTTTTTGGCTAGTAGATTGTTTGGAGTCAG        | 53 |
| 383 | GCCCTTCTAAGAGCTATGGGTTTTTTTTGGAGACCAAAGAATGTTGAGCAGG         | 53 |
| 384 | ATTTAGCCCGGAGCCCTGTGCTCCCAACAGAGGCAGATTTTTTTTTGGTATTGT       | 53 |
| 385 | TTAGAACTCCGATACCCGATATCCCAACAGAGGCAGATTTTTTTTTGGGTCCGG       | 53 |
| 386 | TACTGCCCTAAGAGCTATGGG                                        | 21 |
| 387 | CGGAACCTAAGAGCTATGGG                                         | 21 |
| 388 | GGCGGCTAAAGTGTACTCCTAAGAGCTATGGG                             | 32 |
| 389 | GGCGGCTAAAGAGGCCCCCAACAGAGGCAGATTTTTTTTTGGGCCGAT             | 48 |
| 390 | TCGATCTCCAACAGAGGCAGATTTTTTTTTGGGACAAA                       | 37 |
| 391 | ATTTGCGCCAACAGAGGCAGATTTTTTTTTGAGGACAT                       | 37 |
| 392 | TTTTTTTTATATCCTATAAATTACCCATAGCTCTTA                         | 37 |
| 393 | TTTTTTTTCTCTAATTAACGGGTTCTGCCTCTGTTG                         | 37 |
| 394 | TTTTTTTTACCCGGCTGTTGCGGCCATAGCTCTTA                          | 37 |
| 395 | TTTTTTTTAATCTATGGCTTGAATCTGCCTCTGTTG                         | 37 |
| 396 | TTTTTTTTAACAGCTTATCCAGGACCCATAGCTCTTA                        | 37 |
| 397 | TTTTTTTTTACGTCCGTCAAATCCCATAGCTCTTA                          | 37 |
| 398 | TTTTTTTTACCACGTAACCGATGTCCCATAGCTCTTA                        | 37 |
| 399 | TTTTTTTTCTCTAGTCCAAGTACTCTGCCTCTGTTG                         | 37 |
| 400 | ACACCTTGGCTTCCCTGGCGTATGTCGATTGACGATTGTTCTGCCTCTGTTG         | 53 |
| 401 | CTATCATCTATAACCTTGGCTGCTAGCTGCGTGACGACTCTGCCTCTGTTG          | 53 |
| 402 | CCC GCCCTTTTTTTTTTTTTTTTTGGGACCGCGATGTGTCGC                  | 43 |
| 403 | CCTACCGACTCATAATTGGCAATAAGTTAAAAGCGGCGGGGTCTAGGACGATGTGTCGC  | 59 |
| 404 | GGGGCGGGAATCTAGGCGATGTGTCGC                                  | 27 |
| 405 | TGTCACATCACGTCTCTGCCAGGGATTATGAGTCGGTAGGCGGTGATTTCGATGTGTCGC | 59 |
| 406 | CACAGCCCTTTTTTTTTTTTTTTTTGGGCGGATCGATGTGTCGC                 | 43 |
| 407 | CCCTGGCACCTAGATTTACGGGTGACAGGTAACGATGTGTCGC                  | 43 |
| 408 | ACCAGCCACCAGTCACTCAGGGGTCCAGAAGACGATGTGTCGC                  | 43 |
| 409 | GGGCTGTGGAGCATTGCGATGTGTCGC                                  | 27 |
| 410 | GTCGGCACCAACATCCGGATAACGGTGACTGGTGGCTGGTCGTGATTTCGATGTGTCGC  | 59 |
| 411 | GCGGCCACAATTTCCAGCATTCCTTTTTTTTTTTTTTTGGAACCTACGATGTGTCGC    | 59 |
| 412 | CGTTATCCCAATGCTCGGGCTGCGGGTCATAGCGATGTGTCGC                  | 43 |
| 413 | CCATGCGTCTACAGCCTGCGACCTACGACCTGTATTACAGGAACTCAGCGATGTGTCGC  | 59 |
| 414 | GGAATGCTGGAATGCGATGTGTCGC                                    | 27 |
| 415 | CTCAGCATCTTGCTACTGGGCCGAGGTCGTAGGTCGAGGCTGTAGGCGATGTGTCGC    | 59 |
| 416 | CCC GCCCTTTTTTTTTTTTTTTTTGGGACCGCGAGATATAAGACGTA             | 48 |
| 417 | CTCCGGCTTCTGATCCCCGCTGCCTGCCACCGAGCGCTGAGAACCGT              | 48 |
| 418 | TAAAACCTCGGGCCCCGGGCAGCTGGCGGCGAACGGGAGTCCGGCGAT             | 48 |
| 419 | GCGGCCACAATTTCCAGCATTCCTTTTTTTTTTTTTTTGGAACCTA               | 48 |
| 420 | CCTACCGACTCATAATTGGCAATAAGTTAAAAGCGGCGGGGTCTAGGA             | 48 |
| 421 | TTTTTTTTCACCCAGTGCCTATGCCCTTGATGGGCGCTGCAGGATG               | 48 |

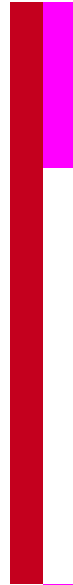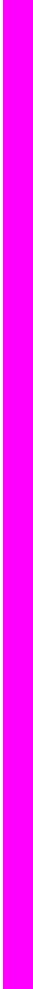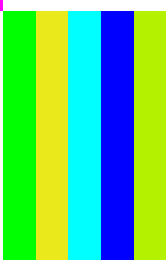



|         |                                                   |    |
|---------|---------------------------------------------------|----|
| 422     | TTTTTTTTTATACCATACTCATGTTTCCTACGCAGGGAGAGTAGAA    | 48 |
| 423     | TTTTTTTTCCGCGGCTCCCAGCCACTGACCCAGCTAAGCCAGGTCAG   | 48 |
| 424     | CCATGCGTCTACAGCCTGCGACCTACGACCTGTATTACAGGAAGTCTAG | 48 |
| 425     | TGTCACATCACGTCTCTGCCAGGGATTATGAGTCGGTAGGCCGGTGATT | 48 |
| 426     | AGCGCCCCGACTACATACATCCTACGGTCTGACGGTACTATACAGG    | 48 |
| 427     | GTCGGCACCAACATCCGGATAACGGTGACTGGTGGCTGGTCGTGATT   | 48 |
| 428     | CAATTGCCGCTAGCCCCGAGTCCCGCACGCTGCGTGGATTGGACGGG   | 48 |
| 429     | CTCAGCATCTTGCTACTGGGCCGAGGTCGTAGGTCGCAGGCTGTAGG   | 48 |
| 430     | GCTTGCAAATCGCCGACTCCCGTTCGCCGCCAGTTCTAAGGACTTAA   | 48 |
| 431     | TGTACTCCTTTTTTTT                                  | 16 |
| 432     | GGGGCGGAATCTAGG                                   | 16 |
| 433     | CAGCGCTCCAAGTCCC                                  | 16 |
| 434     | GGGCTGTGGAGCATTG                                  | 16 |
| 435     | GCTTGTCCATCGGCC                                   | 16 |
| 436     | GGAATGCTGAAAATTG                                  | 16 |
| 437     | AGCTGCCAGTATCCC                                   | 16 |
| 438     | ATTCACCCTTTTTTTTTTTTTTTTTTTGGGACTTG               | 32 |
| 439     | CACAGCCCTTTTTTTTTTTTTTTTTTTGGGCGGAT               | 32 |
| 440     | AGGCCCTTTTTTTTTTTTTTTTTTTGGGCCGAT                 | 32 |
| 441     | CCCTGGCACCTAGATTTACGGGTGACAGGTAA                  | 32 |
| 442     | CCTTGGGTGCCCGCAGGACAAGCAGCGTGCG                   | 32 |
| 443     | CGTTATCCCAATGCTCGGGCTGCGGGTCATAG                  | 32 |
| 444     | CTCGCCATCCGCTGTAGGATGTATGTAGTAC                   | 32 |
| 445     | ACCAGCCACCAGTCACTCAGGGGTCCAGAAGA                  | 32 |
| 446     | CCATTCCACGGACCTCGGACTCGGGGGCTAGC                  | 32 |
| 447     | GTCTTGGCCTGACCTGGATGTTAAGTGACGGA                  | 32 |
| 448     | GTACCTCGCATCCTGCATGGTTGAGTGAACGA                  | 32 |
| 449     | TGTGTCCACATTCAATGTGAGATGCAGGTTGC                  | 32 |
| 450     | ATCCGCGCTACGTATCGGCAGGAGCCAACGGT                  | 32 |
| 451     | TTCGCGTGCCACACGTACGCATGGCGTCGGGT                  | 32 |
| 452     | CTTCCGATCGCCGTAATAAGTGGTACGAAGT                   | 32 |
| 453     | ATCCGCAACTGCCATCGACGAATGACGTGTGGCACGCAATTTTTTTT   | 48 |
| 454     | CCCATGTTCTTGCCCTAAGTCAAGAGACACAAGCGTGTGTTTTTTT    | 48 |
| 455     | CCCTAGTTCCAGATCTTGCAAGCTACGGGCGATCGGAAGTTTTTTTT   | 48 |
| DUT1-1  | TTTTTTTTTTCGCAGGTGGAGTTTTTTTTTTGGTTGTTGGATTCA     | 47 |
| DUT1-2  | TTTTTTTTTGTCTCCGTGGAAGTATTTTTTTTGGTTGTTGGATTCA    | 47 |
| DUT1-3  | TTTTTTTTTAACCCGAGGCGAGTGCTTTTTTTTGGTTGTTGGATTCA   | 47 |
| DUT1-4  | TTTTTTTTTGACATCGCGCCAAGACTTTTTTTTGGTTGTTGGATTCA   | 47 |
| DUT1-5  | TTTTTTTTTACCGTTGGGATAAATGTTTTTTTGGTTGTTGGATTCA    | 47 |
| DUT1-6  | TTTTTTTTTGCTCTTGTGGACACATTTTTTTTGGTTGTTGGATTCA    | 47 |
| DUT1-7  | TTTTTTTTTCGTTACGAGACATATTTTTTTTGGTTGTTGGATTCA     | 47 |
| DUT1-8  | TTTTTTTTTCGTTGCTGAACTGGTTTTTTTTTGGTTGTTGGATTCA    | 47 |
| DUT1-9  | TTTTTTTTTCCGTCACGTTAAGGTTTTTTTTTGGTTGTTGGATTCA    | 47 |
| DUT1-10 | TTTTTTTTTCACGCTACCGAGGTACTTTTTTTTGGTTGTTGGATTCA   | 47 |

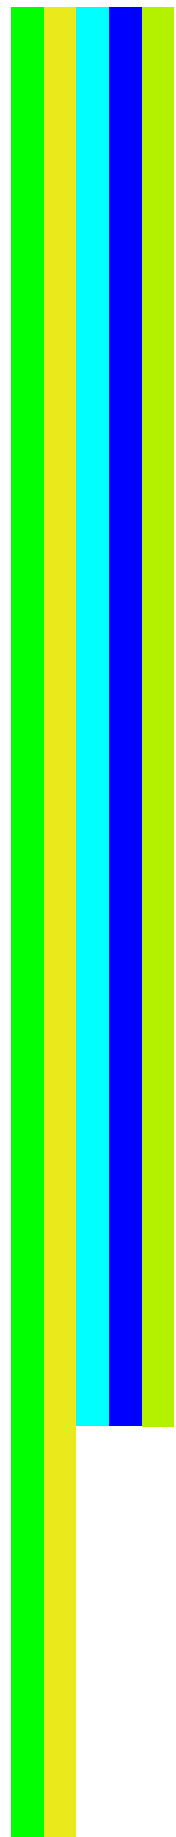

|         |                                                    |    |
|---------|----------------------------------------------------|----|
| DUT1-11 | TTTTTTTTGCAACCTGTGGGCGTGTTTTTTTTGGTTGTTGGATTCA     | 47 |
| DUT1-12 | TTTTTTTTTACCGGATGCGCGGATTTTTTTTTGGTTGTTGGATTCA     | 47 |
| DUT1-13 | TTTTTTTTACTTCGTAACATAATTGTTTTTTTTGGTTGTTGGATTCA    | 47 |
| DUT1-14 | TTTTTTTTTCAATACAGTCTGAACTTTTTTTTTGGTTGTTGGATTCA    | 47 |
| DUT1-15 | TTTTTTTTACCCGACGTGTGGTTATTTTTTTTTGGTTGTTGGATTCA    | 47 |
| DUT2-1  | TTTTTTTTTTTCGCAGGTGGAGTTTTTTTTTTGGCTGGCAGGATGCT    | 47 |
| DUT2-2  | TTTTTTTTTGTCTCCGTGGAAGTATTTTTTTTTGGCTGGCAGGATGCT   | 47 |
| DUT2-3  | TTTTTTTTAACCCGAGGCGAGTGCTTTTTTTTGGCTGGCAGGATGCT    | 47 |
| DUT2-4  | TTTTTTTTGACATCGCGCCAAGACTTTTTTTTTGGCTGGCAGGATGCT   | 47 |
| DUT2-5  | TTTTTTTTACCGTTGGGATAAATGTTTTTTTTGGCTGGCAGGATGCT    | 47 |
| DUT2-6  | TTTTTTTTTGCTCTTGTGGACACATTTTTTTTTGGCTGGCAGGATGCT   | 47 |
| DUT2-7  | TTTTTTTTTCGTTACGAGACATATTTTTTTTTGGCTGGCAGGATGCT    | 47 |
| DUT2-8  | TTTTTTTTCGTTGCCTGAACTTGGTTTTTTTTTTGGCTGGCAGGATGCT  | 47 |
| DUT2-9  | TTTTTTTTTCCGTCACGTTAAAGGTTTTTTTTTTGGCTGGCAGGATGCT  | 47 |
| DUT2-10 | TTTTTTTTTACGCTACCGAGGTACTTTTTTTTTGGCTGGCAGGATGCT   | 47 |
| DUT2-11 | TTTTTTTTGCAACCTGTGGGCGTGTTTTTTTTTGGCTGGCAGGATGCT   | 47 |
| DUT2-12 | TTTTTTTTTACCGGATGCGCGGATTTTTTTTTGGCTGGCAGGATGCT    | 47 |
| DUT2-13 | TTTTTTTTACTTCGTAACATAATTGTTTTTTTTTTGGCTGGCAGGATGCT | 47 |
| DUT2-14 | TTTTTTTTTCAATACAGTCTGAACTTTTTTTTTGGCTGGCAGGATGCT   | 47 |
| DUT2-15 | TTTTTTTTACCCGACGTGTGGTTATTTTTTTTTGGCTGGCAGGATGCT   | 47 |
| DUB1-1  | GTCGGTTCACGGAGCTTTTTTTTTTTCGCAGGTGGAGTTTTTTTTTT    | 47 |
| DUB1-2  | GTCGGTTCACGGAGCTTTTTTTTTGTCTCCGTGGAAGTATTTTTTTT    | 47 |
| DUB1-3  | GTCGGTTCACGGAGCTTTTTTTTAACCCGAGGCGAGTGCTTTTTTTT    | 47 |
| DUB1-4  | GTCGGTTCACGGAGCTTTTTTTTGACATCGCGCCAAGACTTTTTTTT    | 47 |
| DUB1-5  | GTCGGTTCACGGAGCTTTTTTTTACCGTTGGGATAAATGTTTTTTT     | 47 |
| DUB1-6  | GTCGGTTCACGGAGCTTTTTTTTGCTCTTGTGGACACATTTTTTTT     | 47 |
| DUB1-7  | GTCGGTTCACGGAGCTTTTTTTTCGTTACGAGACATATTTTTTTT      | 47 |
| DUB1-8  | GTCGGTTCACGGAGCTTTTTTTTCGTTGCCTGAACTTGGTTTTTTT     | 47 |
| DUB1-9  | GTCGGTTCACGGAGCTTTTTTTTCCGTCACGTTAAAGGTTTTTTT      | 47 |
| DUB1-10 | GTCGGTTCACGGAGCTTTTTTTTACGCTACCGAGGTACTTTTTTTT     | 47 |
| DUB1-11 | GTCGGTTCACGGAGCTTTTTTTTGAACCTGTGGGCGTGTTTTTTTT     | 47 |
| DUB1-12 | GTCGGTTCACGGAGCTTTTTTTTACCGGATGCGCGGATTTTTTTT      | 47 |
| DUB1-13 | GTCGGTTCACGGAGCTTTTTTTTACTTCGTAACATAATTGTTTTTTT    | 47 |
| DUB1-14 | GTCGGTTCACGGAGCTTTTTTTTCAATACAGTCTGAACTTTTTTTT     | 47 |
| DUB1-15 | GTCGGTTCACGGAGCTTTTTTTTACCCGACGTGTGGTTATTTTTTTT    | 47 |
| DUB2-1  | GACCGAGTACTGTTTTTTTTTTTTTTCGCAGGTGGAGTTTTTTTTTT    | 47 |
| DUB2-2  | GACCGAGTACTGTTTTTTTTTTTGTCTCCGTGGAAGTATTTTTTTT     | 47 |
| DUB2-3  | GACCGAGTACTGTTTTTTTTTTAACCCGAGGCGAGTGCTTTTTTTT     | 47 |
| DUB2-4  | GACCGAGTACTGTTTTTTTTTTGACATCGCGCCAAGACTTTTTTTT     | 47 |
| DUB2-5  | GACCGAGTACTGTTTTTTTTTTACCGTTGGGATAAATGTTTTTTT      | 47 |
| DUB2-6  | GACCGAGTACTGTTTTTTTTTTTGCTCTTGTGGACACATTTTTTTT     | 47 |
| DUB2-7  | GACCGAGTACTGTTTTTTTTTTTCGTTACGAGACATATTTTTTTT      | 47 |
| DUB2-8  | GACCGAGTACTGTTTTTTTTTTTCGTTGCCTGAACTTGGTTTTTTT     | 47 |
| DUB2-9  | GACCGAGTACTGTTTTTTTTTTTCCGTCACGTTAAAGGTTTTTTT      | 47 |

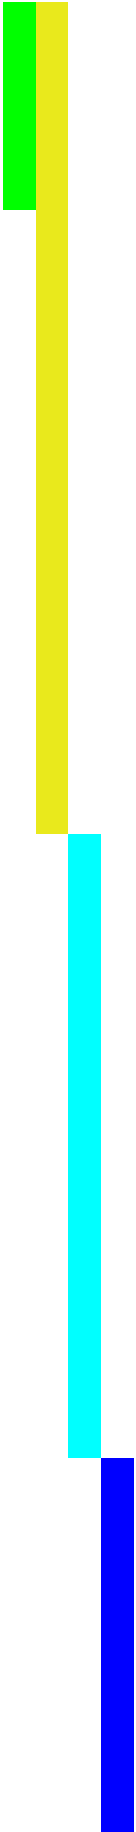

|         |                                                   |    |
|---------|---------------------------------------------------|----|
| DUB2-10 | GACCGAGTACTGTTTTTTTTTTCACGCTACCGAGGTACTTTTTTTT    | 47 |
| DUB2-11 | GACCGAGTACTGTTTTTTTTTTGCAACCTGTGGGCGTGTTTTTTTT    | 47 |
| DUB2-12 | GACCGAGTACTGTTTTTTTTTTACCGGATGCGCGGATTTTTTTTT     | 47 |
| DUB2-13 | GACCGAGTACTGTTTTTTTTTTACTTCGTAACATATTGTTTTTTTT    | 47 |
| DUB2-14 | GACCGAGTACTGTTTTTTTTTTCAATACAGTCTGAACTTTTTTTTT    | 47 |
| DUB2-15 | GACCGAGTACTGTTTTTTTTTTACCCGACGTGTGGTTATTTTTTTTT   | 47 |
| DUB3-1  | GCAGCTCGTGGACCATTTTTTTTTTCGCAGGTGGAGTTTTTTTTTT    | 47 |
| DUB3-2  | GCAGCTCGTGGACCATTTTTTTTTTGCTCTCCGTGGAAGTATTTTTTTT | 47 |
| DUB3-3  | GCAGCTCGTGGACCATTTTTTTTAACCCGAGGCGAGTGCTTTTTTTTT  | 47 |
| DUB3-4  | GCAGCTCGTGGACCATTTTTTTTGACATCGCGCAAGACTTTTTTTTT   | 47 |
| DUB3-5  | GCAGCTCGTGGACCATTTTTTTTACCGTTGGGATAAATGTTTTTTTT   | 47 |
| DUB3-6  | GCAGCTCGTGGACCATTTTTTTTGCTCTTGTGGACACATTTTTTTTT   | 47 |
| DUB3-7  | GCAGCTCGTGGACCATTTTTTTTCGTTACGAGACATATTTTTTTTT    | 47 |
| DUB3-8  | GCAGCTCGTGGACCATTTTTTTTCGTTGCCTGAACTTGGTTTTTTTT   | 47 |
| DUB3-9  | GCAGCTCGTGGACCATTTTTTTTCCGTCACGTTAAGGTTTTTTTT     | 47 |
| DUB3-10 | GCAGCTCGTGGACCATTTTTTTTCACGCTACCGAGGTACTTTTTTTTT  | 47 |
| DUB3-11 | GCAGCTCGTGGACCATTTTTTTTGCAACCTGTGGGCGTGTTTTTTTTT  | 47 |
| DUB3-12 | GCAGCTCGTGGACCATTTTTTTTACCGGATGCGCGGATTTTTTTTT    | 47 |
| DUB3-13 | GCAGCTCGTGGACCATTTTTTTTACTTCGTAACATATTGTTTTTTTT   | 47 |
| DUB3-14 | GCAGCTCGTGGACCATTTTTTTTCAATACAGTCTGAACTTTTTTTTT   | 47 |
| DUB3-15 | GCAGCTCGTGGACCATTTTTTTTACCCGACGTGTGGTTATTTTTTTTT  | 47 |

## 15. References

- S1 N. C. Seeman, *J. Biomol. Struct. Dyn.*, 1990, **8**, 573-581.  
S2 B. Wei, M. Dai and P. Yin, *Nature*, 2012, **485**, 623-627.  
S3 Y. Ke, L. L. Ong, W. M. Shih and P. Yin, *Science*, 2012, **338**, 1177-1183.
